# Supplementary material for: A theoretical study based on DFT calculations on the different influence of functional groups on the C–H activation process via Pd-catalysed β-X elimination
Source: Royal Society of Chemistry journal article supplement (doi:10.1039/d2ra03506e), 2022-01-01
Supplement: d2ra03506e1.pdf [file d2ra03506e1.pdf]

Supporting Information available for

**A theoretical study based on DFT calculations on the  
different influence of functional groups on the C-H  
activation process via Pd-catalyzed  $\beta$ -X elimination**

Xin Xiang,<sup>a</sup> Zeng-Xia Zhao,<sup>\*a</sup> Hong-Xing Zhang<sup>\*a</sup>

<sup>a</sup>Laboratory of Theoretical and Computational Chemistry,

Institute of Theoretical Chemistry, College of Chemistry,

Jilin University, Changchun 130023,

People's Republic of China

For submission to:

RSC Advances

## Table of Contents

1. **Fig. S1** The geometric structures for the intermediate **M1**, **M2**, **M3**, **M4** and the transition state **TS1**, **TS2** and some important bond lengths (in Å).
2. **Fig. S2** The geometric structures for the intermediate **M5**, **M6**, **M7** and the transition state **TS3**, **TS4'**, **TS4** and some important bond lengths (in Å).
3. **Fig. S3** The geometric structures for the intermediate **M8**, **M9**, **M10** and the transition state **TS5** and some important bond lengths (in Å).
4. **Fig. S4** Overview of free energy for **2A-OH** catalytic activation.
5. **Fig. S5** Overview of free energy for **N-2A** catalytic activation.
6. **Fig. S6** Overview of free energy for **HO-2A** catalytic activation.
7. **Fig. S7** The geometry and the  $\text{Et}(\text{frag-a})_{\text{TS}}$ , and  $\text{Et}(\text{frag-a})_{\text{opt}}$  energy value of the fragment a. And the example of deformation energy analysis.
8. **Fig. S8** The Non-Covalent Interactions for the steric interaction of geometry **TS4** of different nucleophile groups.
9. Cartesian coordinates for all of the calculated structures.

B3LYP combined with DFT-D3(BJ) dispersion correction, called B3LYP-D3(BJ), is very reasonable for the description of systems involving weak interactions, and has still been widely used in many recent studies. "B3LYP, still have an important role to play in the search for transition state geometries for organic reactions, and can generate results that are almost as reliable as much more expensive computational method. [1]"

[1] Goodman, L. S. o. J. M. (2011). "How reliable are DFT transition structures? Comparison of GGA, hybrid-meta-GGA and meta-GGA functionals." *Organic & Biomolecular Chemistry* **9**: 689.

Fig. S1 The geometric structures for the intermediate **M1**, **M2**, **M3**, **M4** and the transition state **TS1**, **TS2** and some important bond lengths (in Å).

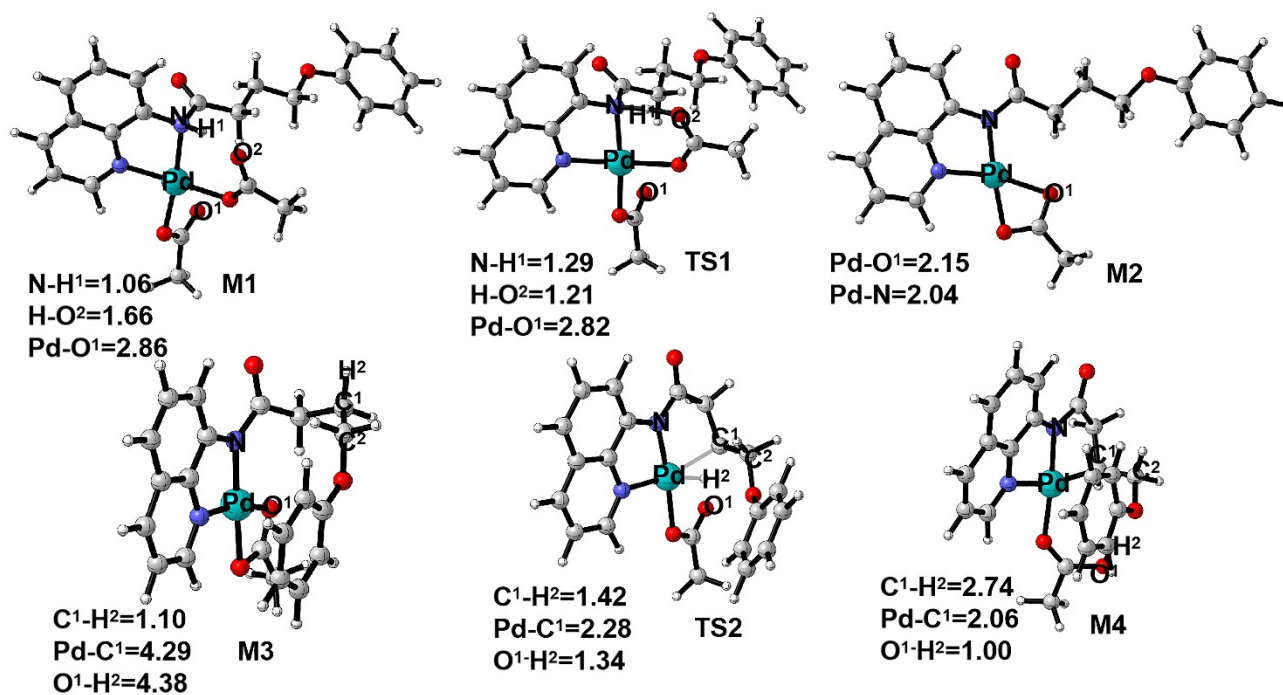

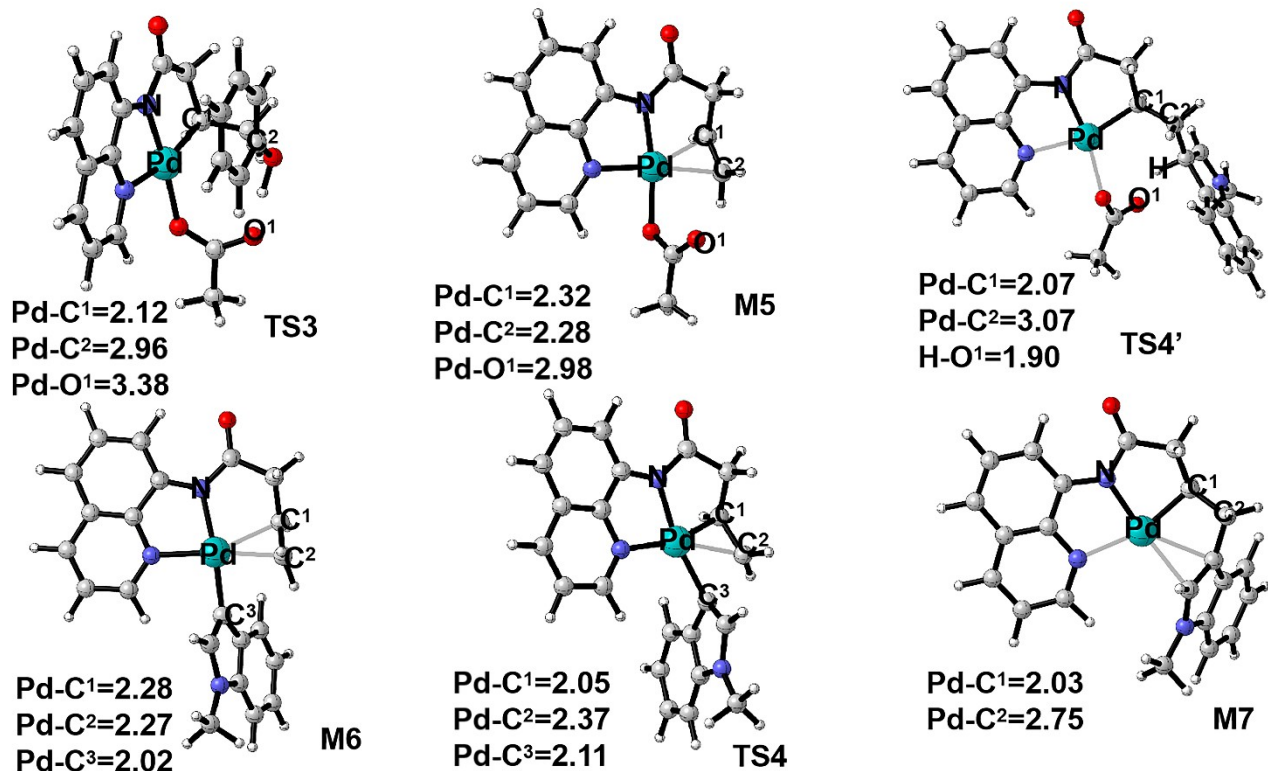

Fig. S2 The geometric structures for the intermediate M5, M6, M7 and the transition state TS3, TS4', Ts4 and some important bond lengths (in Å).

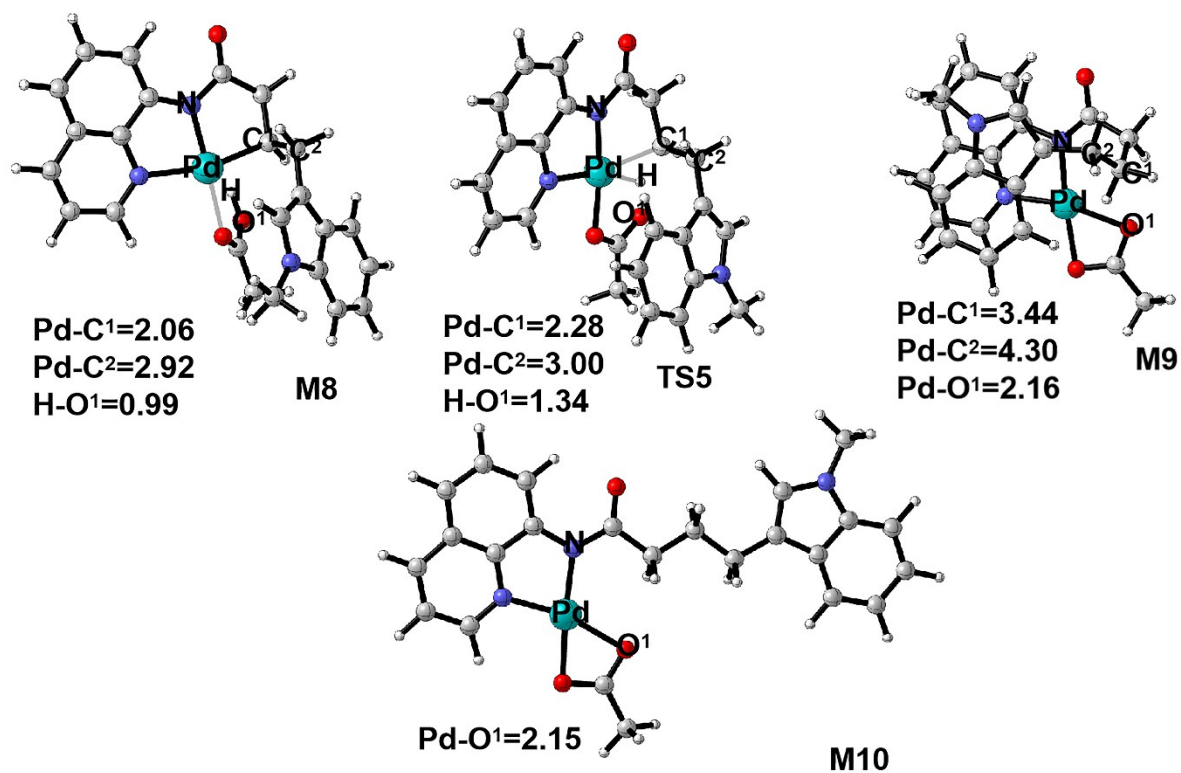

Fig. S3 The geometric structures for the intermediate M8, M9, M10 and the transition state TS5 and some important bond lengths (in Å).

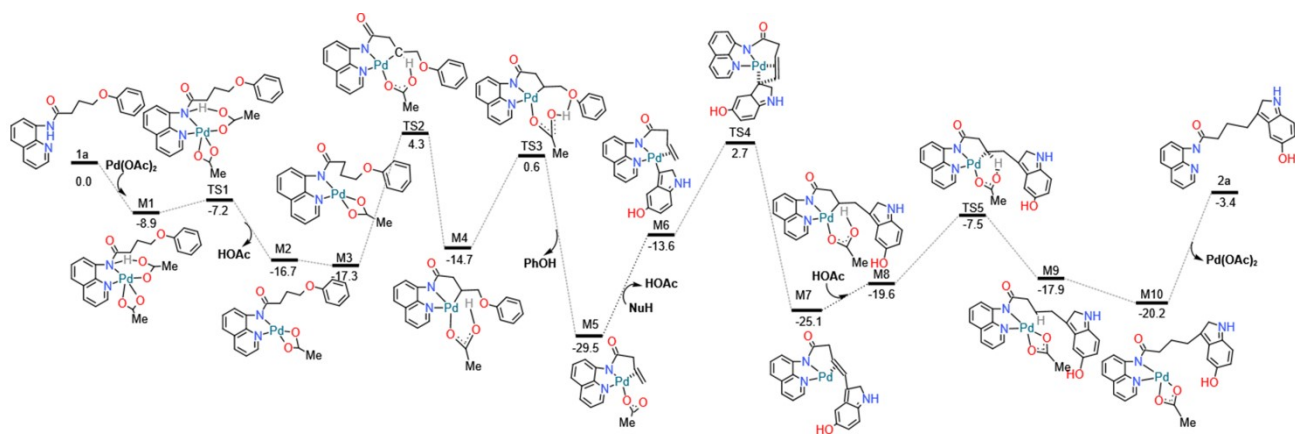

Fig. S4 Overview of free energy for 2A-OH catalytic activation.

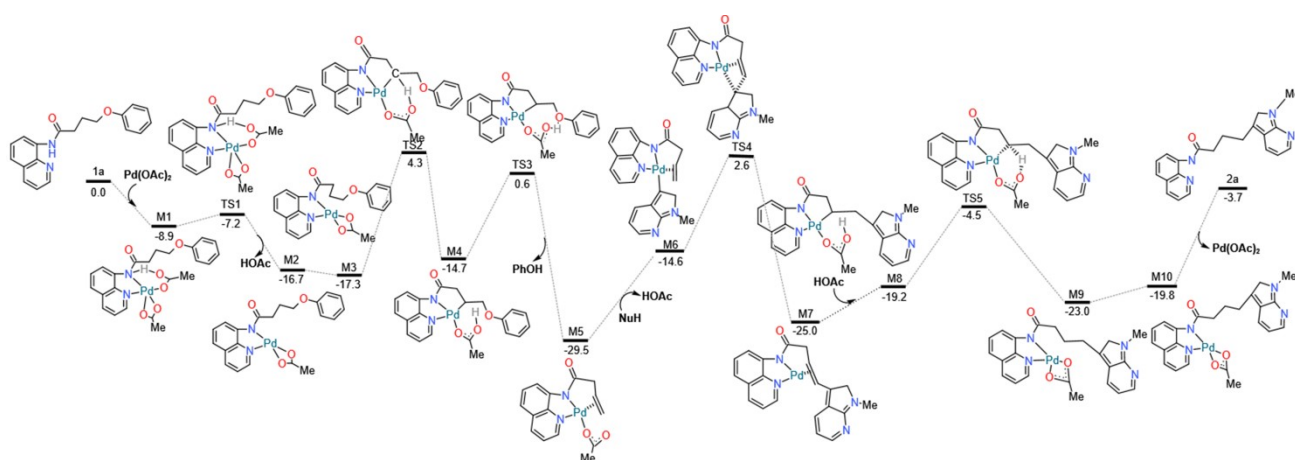

Fig. S5 Overview of free energy for N-2A catalytic activation.

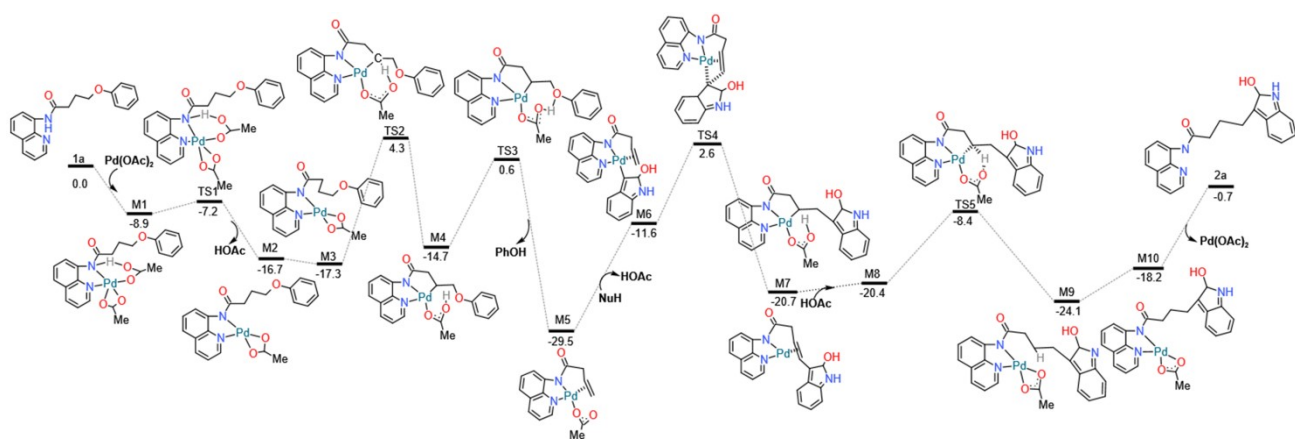

Fig. S6 Overview of free energy for HO-2A catalytic activation.

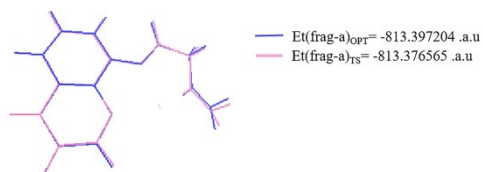

**Fig. S7** The geometry and the Et(frag-a)TS, and Et(frag-a)opt energy value of the fragment a.

**The example of deformation energy analysis:**

$$\Delta E_{tot} = E(TS4) - E(Frag_a) - E(Frag_b) = -0.080142 \text{ a.u.} = -50.49 \text{ kcal mol}^{-1}$$

$$\Delta E_{orb} = E\_SCF\_last - E\_SCF\_1st = -0.002079 \text{ a.u.} = -1.31 \text{ kcal mol}^{-1}$$

$$\Delta E_{steric} = \Delta E_{els} + \Delta E_{ex} = \Delta E_{tot} - \Delta E_{orb} = -0.078063 \text{ a.u.} = -49.18 \text{ kcal mol}^{-1}$$

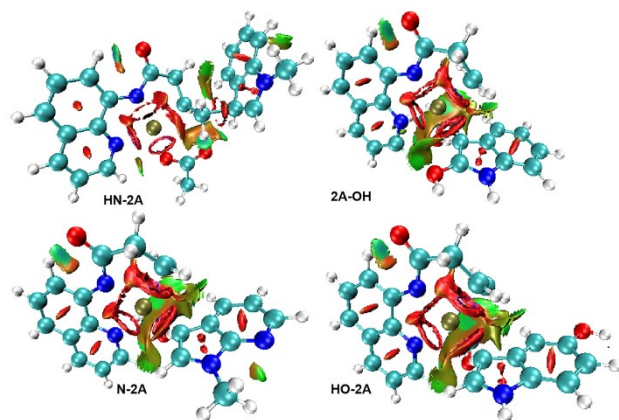

**Fig. S8** The Non-Covalent Interactions for the steric interaction of geometry TS4 of different nucleophile groups.

**Cartesian coordinates for all of the calculated structures.**

**Pd(OAc)<sub>2</sub>**

SCF Done: -583.750577 .a.u

|    |           |           |           |
|----|-----------|-----------|-----------|
| Pd | 0.693141  | 1.231187  | 0.040553  |
| O  | 1.405068  | 0.918228  | 1.970209  |
| O  | 0.255482  | -0.603109 | 0.919284  |
| O  | -0.018393 | 1.544261  | -1.889022 |
| O  | 1.130848  | 3.065142  | -0.838412 |
| C  | 0.887481  | -0.251635 | 1.974526  |
| C  | 0.498955  | 2.713968  | -1.893529 |
| C  | 0.345473  | 3.635867  | -3.060194 |

|   |           |           |           |
|---|-----------|-----------|-----------|
| H | 0.248457  | 3.059388  | -3.982917 |
| H | -0.565110 | 4.231544  | -2.926439 |
| H | 1.198233  | 4.316302  | -3.114653 |
| C | 1.041130  | -1.173624 | 3.141139  |
| H | 1.137837  | -0.596986 | 4.063820  |
| H | 0.188137  | -1.853799 | 3.195626  |
| H | 1.951649  | -1.769490 | 3.007728  |

**Sub-HN-2A**

SCF Done: -403.141432 .a.u

|   |           |           |           |
|---|-----------|-----------|-----------|
| C | -1.701807 | 2.432016  | 0.042703  |
| C | -3.125729 | 2.429421  | 0.065912  |
| C | -3.804224 | 3.659199  | 0.025367  |
| C | -3.067602 | 4.835949  | -0.035827 |
| C | -1.657323 | 4.814024  | -0.057780 |
| C | -0.955318 | 3.614012  | -0.018987 |
| C | -2.391277 | 0.299739  | 0.143042  |
| C | -3.534432 | 1.054853  | 0.129967  |
| H | -4.890841 | 3.686157  | 0.041836  |
| H | -3.583585 | 5.791838  | -0.067440 |
| H | -1.109564 | 5.751277  | -0.105884 |
| H | 0.130897  | 3.596487  | -0.035937 |
| H | -2.266273 | -0.774100 | 0.185982  |
| H | -4.547182 | 0.677380  | 0.162143  |
| C | 0.106654  | 0.692631  | 0.086502  |
| H | 0.615462  | 1.023849  | -0.826890 |
| H | 0.644060  | 1.099368  | 0.951721  |
| H | 0.146703  | -0.397959 | 0.132164  |
| N | -1.275893 | 1.118815  | 0.090698  |

**Sub-2A-OH**

SCF Done: -439.040585 .a.u

|   |           |           |           |
|---|-----------|-----------|-----------|
| C | -1.768403 | 2.408797  | -0.021313 |
| C | -3.191967 | 2.394304  | -0.033639 |
| C | -3.891598 | 3.610404  | -0.092931 |
| C | -3.168064 | 4.795970  | -0.138081 |
| C | -1.755509 | 4.792539  | -0.125105 |
| C | -1.042579 | 3.599871  | -0.066607 |
| C | -2.448076 | 0.263184  | 0.066300  |
| C | -3.593025 | 1.016480  | 0.022958  |
| H | -4.976197 | 3.646848  | -0.104348 |
| H | -1.219384 | 5.739058  | -0.161621 |
| H | 0.044119  | 3.604213  | -0.056755 |
| H | -2.323932 | -0.809940 | 0.114111  |
| H | -4.604990 | 0.635980  | 0.030243  |
| H | -0.384500 | 0.788899  | 0.061932  |
| N | -1.344559 | 1.092884  | 0.040242  |
| O | -3.882948 | 5.970424  | -0.195778 |
| H | -3.261631 | 6.713311  | -0.222715 |

**Sub-N-2A**

SCF Done: -419.185636 .a.u

|   |           |          |          |
|---|-----------|----------|----------|
| C | -1.749449 | 2.450428 | 0.056137 |
| C | -3.175741 | 2.419639 | 0.032396 |
| C | -3.826417 | 3.659797 | 0.032284 |
| C | -3.035938 | 4.805482 | 0.055063 |
| C | -1.632515 | 4.692703 | 0.077171 |
| C | -2.394969 | 0.309780 | 0.027260 |
| C | -3.557449 | 1.039367 | 0.014350 |



|   |           |           |           |
|---|-----------|-----------|-----------|
| H | -4.911312 | 3.726389  | 0.015026  |
| H | -3.489907 | 5.791801  | 0.056036  |
| H | -1.017345 | 5.590397  | 0.095007  |
| H | -2.251837 | -0.762541 | 0.020487  |
| H | -4.560702 | 0.636576  | -0.005584 |
| C | 0.098624  | 0.746390  | 0.071919  |
| H | 0.348482  | 0.163665  | -0.821693 |
| H | 0.705231  | 1.653225  | 0.090074  |
| H | 0.318995  | 0.147656  | 0.962699  |
| N | -1.295175 | 1.147667  | 0.052513  |
| N | -0.970456 | 3.531176  | 0.078146  |

**Sub-HO-2A**

SCF Done: -439.042837 .a.u

|   |           |          |           |
|---|-----------|----------|-----------|
| C | -1.686816 | 2.484262 | 0.137639  |
| C | -3.109606 | 2.438195 | 0.099107  |
| C | -3.814269 | 3.643544 | -0.040325 |
| C | -3.104589 | 4.837614 | -0.136152 |
| C | -1.698434 | 4.856011 | -0.095538 |
| C | -0.970028 | 3.675385 | 0.042439  |
| C | -2.331634 | 0.340718 | 0.328467  |
| C | -3.497213 | 1.057238 | 0.223017  |
| H | -4.900753 | 3.641996 | -0.072907 |
| H | -3.645464 | 5.774019 | -0.244395 |
| H | -1.170773 | 5.802539 | -0.172580 |
| H | 0.116451  | 3.683291 | 0.074515  |
| H | -4.500593 | 0.654099 | 0.232038  |
| H | -0.285310 | 0.864060 | 0.337806  |
| N | -1.241580 | 1.177293 | 0.279593  |

|   |           |           |          |
|---|-----------|-----------|----------|
| O | -2.072269 | -0.983291 | 0.466071 |
| H | -2.917868 | -1.456041 | 0.486782 |

**1a**

SCF Done: -994.926468 .a.u

|   |            |           |           |
|---|------------|-----------|-----------|
| C | -13.300229 | -0.897296 | 0.222386  |
| C | -11.988089 | -1.278614 | 0.001423  |
| C | -10.958212 | -0.280985 | -0.053109 |
| C | -11.300988 | 1.092776  | 0.121314  |
| C | -12.654077 | 1.451415  | 0.345381  |
| C | -13.617793 | 0.470055  | 0.391978  |
| H | -14.069629 | -1.654744 | 0.263222  |
| C | -10.240060 | 2.029849  | 0.057272  |
| H | -12.911460 | 2.498459  | 0.477949  |
| H | -14.655695 | 0.740205  | 0.563820  |
| C | -8.954469  | 1.593151  | -0.164385 |
| C | -8.725526  | 0.206520  | -0.324054 |
| H | -10.458591 | 3.087041  | 0.185157  |
| H | -8.122479  | 2.287927  | -0.218149 |
| H | -7.716266  | -0.161559 | -0.500493 |
| N | -9.681629  | -0.700738 | -0.272177 |
| N | -11.546877 | -2.590784 | -0.179825 |
| H | -10.542940 | -2.640701 | -0.328378 |
| C | -12.287309 | -3.745684 | -0.200391 |
| O | -13.498131 | -3.786252 | -0.024604 |
| C | -11.466888 | -4.999709 | -0.494499 |
| C | -12.027752 | -6.222374 | 0.233838  |
| H | -10.411377 | -4.840811 | -0.239989 |
| H | -11.504666 | -5.163452 | -1.581499 |

|   |            |            |           |
|---|------------|------------|-----------|
| C | -11.318151 | -7.500118  | -0.181935 |
| H | -11.927558 | -6.093396  | 1.317600  |
| H | -13.097107 | -6.306559  | 0.022110  |
| H | -11.436826 | -7.676753  | -1.261672 |
| H | -10.239834 | -7.439510  | 0.029467  |
| O | -11.897175 | -8.570247  | 0.554197  |
| C | -11.416477 | -9.832013  | 0.353352  |
| C | -10.388231 | -10.156263 | -0.538607 |
| C | -12.024559 | -10.840651 | 1.114095  |
| C | -9.978451  | -11.487546 | -0.659798 |
| H | -9.906590  | -9.391543  | -1.136196 |
| C | -11.605898 | -12.158937 | 0.981943  |
| H | -12.820033 | -10.562400 | 1.797894  |
| C | -10.578385 | -12.493108 | 0.093224  |
| H | -9.179403  | -11.731125 | -1.354887 |
| H | -12.084712 | -12.932083 | 1.576622  |
| H | -10.253224 | -13.524032 | -0.008134 |

## M1

SCF Done: -1578.701319 .a.u

|   |           |           |           |
|---|-----------|-----------|-----------|
| C | -1.200261 | -0.816740 | 0.393527  |
| H | -1.329113 | -0.836714 | 1.482585  |
| H | -1.107369 | 0.244476  | 0.127613  |
| C | -2.380103 | -1.457301 | -0.334553 |
| C | -3.665281 | -0.697578 | -0.045773 |
| H | -2.500399 | -2.501741 | -0.027001 |
| H | -2.195343 | -1.463319 | -1.412630 |
| H | -3.867240 | -0.665056 | 1.035617  |
| H | -3.589376 | 0.339251  | -0.404139 |

|   |           |           |           |
|---|-----------|-----------|-----------|
| N | 1.245207  | -1.040790 | 0.854798  |
| H | 0.983476  | -0.771518 | 1.845775  |
| C | 0.111861  | -1.483955 | 0.052765  |
| O | 0.271273  | -2.305974 | -0.818544 |
| C | 2.448650  | -1.808670 | 0.640519  |
| C | 3.402586  | -1.266083 | -0.254546 |
| C | 2.661132  | -3.048779 | 1.194930  |
| C | 4.557884  | -2.009826 | -0.616107 |
| C | 3.826313  | -3.783791 | 0.866806  |
| H | 1.921886  | -3.468819 | 1.869215  |
| C | 4.057961  | 0.551548  | -1.573215 |
| C | 5.459516  | -1.407054 | -1.530105 |
| C | 4.747509  | -3.287562 | -0.028929 |
| H | 3.978948  | -4.758567 | 1.318552  |
| C | 5.206803  | -0.141873 | -2.011376 |
| H | 3.837870  | 1.571148  | -1.869794 |
| H | 6.348904  | -1.951205 | -1.835067 |
| H | 5.631342  | -3.861496 | -0.290960 |
| H | 5.882574  | 0.342850  | -2.706938 |
| C | -5.985185 | -0.871196 | -0.606996 |
| C | -6.321633 | 0.278352  | 0.117045  |
| C | -6.983994 | -1.588309 | -1.281557 |
| C | -7.654784 | 0.698355  | 0.158708  |
| H | -5.564494 | 0.848120  | 0.642275  |
| C | -8.304505 | -1.157884 | -1.230350 |
| H | -6.696175 | -2.475475 | -1.836473 |
| C | -8.650732 | -0.010123 | -0.508720 |
| H | -7.907217 | 1.592639  | 0.722092  |

|    |           |           |           |
|----|-----------|-----------|-----------|
| H  | -9.069512 | -1.721481 | -1.757474 |
| H  | -9.682940 | 0.324451  | -0.470561 |
| O  | -4.721078 | -1.373562 | -0.716456 |
| N  | 3.195611  | 0.003971  | -0.733164 |
| O  | 2.221144  | 2.763940  | -0.477509 |
| O  | 0.297800  | 2.603235  | -1.646569 |
| O  | 0.327066  | 1.875609  | 1.468988  |
| O  | 0.357330  | 0.222364  | 3.024236  |
| C  | 1.550153  | 4.665756  | -1.713891 |
| C  | 1.286327  | 3.230898  | -1.281355 |
| C  | 0.046061  | 1.364658  | 2.620068  |
| C  | -0.757671 | 2.290240  | 3.517226  |
| H  | -0.147667 | 3.161819  | 3.777009  |
| H  | -1.061663 | 1.769354  | 4.426510  |
| H  | -1.635876 | 2.658849  | 2.978337  |
| H  | 1.335046  | 5.336503  | -0.874475 |
| H  | 2.600586  | 4.807216  | -1.985251 |
| H  | 0.902771  | 4.923621  | -2.554127 |
| Pd | 1.675333  | 0.958031  | 0.239348  |

## M2

SCF Done: -1349.597959 .a.u

|   |           |           |           |
|---|-----------|-----------|-----------|
| C | -1.064895 | -0.858628 | -0.457776 |
| H | -0.971056 | -0.046242 | 0.272609  |
| H | -1.045440 | -0.364450 | -1.436367 |
| C | -2.380015 | -1.609827 | -0.260491 |
| C | -3.564085 | -0.665305 | -0.383569 |
| H | -2.397280 | -2.091542 | 0.722105  |
| H | -2.473209 | -2.411112 | -1.000174 |

|   |           |           |           |
|---|-----------|-----------|-----------|
| H | -3.505921 | 0.135046  | 0.368967  |
| H | -3.582640 | -0.188232 | -1.374685 |
| N | 1.373759  | -1.161129 | -0.509312 |
| C | 0.145524  | -1.772256 | -0.340196 |
| O | 0.009827  | -2.972329 | -0.109277 |
| C | 2.573528  | -1.871294 | -0.431497 |
| C | 3.748054  | -1.088206 | -0.633505 |
| C | 2.766186  | -3.233551 | -0.184376 |
| C | 5.062397  | -1.636141 | -0.592212 |
| C | 4.068277  | -3.778645 | -0.142785 |
| H | 1.905821  | -3.863276 | -0.025930 |
| C | 4.584109  | 1.066127  | -1.078068 |
| C | 6.141346  | -0.745260 | -0.810564 |
| C | 5.204055  | -3.020395 | -0.338577 |
| H | 4.165123  | -4.842920 | 0.052810  |
| C | 5.909134  | 0.593125  | -1.051527 |
| H | 4.335558  | 2.105839  | -1.261968 |
| H | 7.156190  | -1.132760 | -0.785414 |
| H | 6.195314  | -3.461213 | -0.302196 |
| H | 6.723805  | 1.288194  | -1.220760 |
| C | -5.951928 | -0.784622 | -0.256127 |
| C | -6.107296 | 0.584987  | -0.502920 |
| C | -7.084671 | -1.588479 | -0.057286 |
| C | -7.392331 | 1.134630  | -0.548023 |
| H | -5.245813 | 1.223074  | -0.659083 |
| C | -8.354976 | -1.027017 | -0.105228 |
| H | -6.937560 | -2.646925 | 0.132238  |
| C | -8.519463 | 0.340767  | -0.351280 |

|    |           |           |           |
|----|-----------|-----------|-----------|
| H  | -7.503150 | 2.198611  | -0.740181 |
| H  | -9.223867 | -1.660790 | 0.050469  |
| H  | -9.513033 | 0.777143  | -0.388269 |
| O  | -4.752268 | -1.426960 | -0.190076 |
| N  | 3.563415  | 0.243647  | -0.875164 |
| O  | 1.773708  | 2.887229  | -1.283736 |
| O  | -0.182818 | 1.943837  | -1.014809 |
| C  | -0.166550 | 4.329412  | -1.413554 |
| C  | 0.498344  | 2.996610  | -1.238634 |
| H  | -0.378462 | 4.755518  | -0.425905 |
| H  | 0.489696  | 5.013179  | -1.955904 |
| H  | -1.116457 | 4.207586  | -1.939846 |
| Pd | 1.649681  | 0.823961  | -0.892891 |

### M3

SCF Done: -1349.612479 .a.u

|   |           |           |           |
|---|-----------|-----------|-----------|
| C | -1.421732 | -2.766672 | -0.612662 |
| H | -1.596189 | -1.979781 | -1.342452 |
| H | -1.410281 | -3.726974 | -1.138080 |
| C | -2.558087 | -2.776915 | 0.432986  |
| C | -2.522153 | -1.557545 | 1.344601  |
| H | -2.459175 | -3.666791 | 1.064454  |
| H | -3.526394 | -2.829976 | -0.077245 |
| H | -3.312500 | -1.600515 | 2.105859  |
| H | -1.557061 | -1.517319 | 1.857370  |
| N | 0.521629  | -1.383904 | 0.042397  |
| C | -0.100147 | -2.613308 | 0.123138  |
| O | 0.291093  | -3.527534 | 0.851824  |
| C | 1.467390  | -0.976219 | 0.987262  |

|   |           |           |           |
|---|-----------|-----------|-----------|
| C | 1.858891  | 0.391717  | 0.888335  |
| C | 2.019913  | -1.713045 | 2.037793  |
| C | 2.742916  | 1.011158  | 1.814966  |
| C | 2.901097  | -1.100859 | 2.956956  |
| H | 1.761766  | -2.755154 | 2.137262  |
| C | 1.601154  | 2.392842  | -0.315807 |
| C | 3.035768  | 2.382665  | 1.612376  |
| C | 3.265769  | 0.226576  | 2.870652  |
| H | 3.302852  | -1.713337 | 3.759468  |
| C | 2.470713  | 3.070259  | 0.560295  |
| H | 1.121689  | 2.878439  | -1.157744 |
| H | 3.710800  | 2.883627  | 2.301038  |
| H | 3.945220  | 0.676577  | 3.587920  |
| H | 2.678103  | 4.121228  | 0.392995  |
| C | -2.146341 | 0.792436  | 0.900798  |
| C | -1.431727 | 1.020092  | 2.083119  |
| C | -2.304539 | 1.836912  | -0.024530 |
| C | -0.864919 | 2.276537  | 2.313930  |
| H | -1.302499 | 0.236609  | 2.819162  |
| C | -1.747698 | 3.085101  | 0.225505  |
| H | -2.860747 | 1.636921  | -0.934034 |
| C | -1.016491 | 3.313986  | 1.396168  |
| H | -0.299710 | 2.436558  | 3.227892  |
| H | -1.875928 | 3.879585  | -0.504466 |
| H | -0.574792 | 4.286808  | 1.589080  |
| O | -2.711467 | -0.391715 | 0.539406  |
| N | 1.327895  | 1.109014  | -0.145227 |
| O | -1.081224 | -0.653628 | -2.986946 |



|    |           |          |           |
|----|-----------|----------|-----------|
| O  | -0.333516 | 1.403602 | -2.904531 |
| C  | -1.664208 | 0.795485 | -4.832419 |
| C  | -1.006574 | 0.502214 | -3.515834 |
| H  | -1.848533 | 1.867110 | -4.934582 |
| H  | -0.998965 | 0.476210 | -5.643212 |
| H  | -2.597179 | 0.233202 | -4.918541 |
| Pd | 0.131562  | 0.055448 | -1.350347 |

#### M4

SCF Done: -1349.603500 .a.u

|   |           |           |           |
|---|-----------|-----------|-----------|
| C | 0.575616  | 3.035140  | -1.395852 |
| H | 0.279583  | 3.056982  | -2.451987 |
| H | 1.018407  | 4.014783  | -1.169783 |
| C | 2.275163  | 2.061613  | 0.168466  |
| C | 1.531716  | 1.855348  | -1.153983 |
| H | 3.213345  | 2.608609  | 0.025020  |
| H | 2.243396  | 1.739525  | -1.979103 |
| N | -1.017962 | 1.541569  | -0.423022 |
| C | -0.700866 | 2.874106  | -0.565389 |
| O | -1.340092 | 3.818399  | -0.107443 |
| C | -2.106200 | 1.028211  | 0.264428  |
| C | -2.214204 | -0.406375 | 0.280883  |
| C | -3.071033 | 1.763060  | 0.953652  |
| C | -3.260843 | -1.052931 | 1.001886  |
| C | -4.108113 | 1.109431  | 1.652079  |
| H | -2.999720 | 2.841014  | 0.946336  |
| C | -1.293725 | -2.454629 | -0.355605 |
| C | -3.269016 | -2.470426 | 1.005265  |
| C | -4.215209 | -0.265180 | 1.691171  |

|    |           |           |           |
|----|-----------|-----------|-----------|
| H  | -4.836600 | 1.719367  | 2.179585  |
| C  | -2.291107 | -3.171931 | 0.337291  |
| H  | -0.501258 | -2.962845 | -0.896914 |
| H  | -4.053950 | -2.990220 | 1.548807  |
| H  | -5.012176 | -0.754927 | 2.243005  |
| H  | -2.273931 | -4.256744 | 0.333546  |
| N  | -1.263657 | -1.134056 | -0.387383 |
| Pd | 0.318584  | 0.200779  | -1.035458 |
| O  | 1.668344  | -1.261675 | -1.860172 |
| O  | 3.728628  | -0.745490 | -1.069896 |
| C  | 2.892559  | -1.413846 | -1.837158 |
| C  | 3.574456  | -2.423496 | -2.719259 |
| H  | 4.316050  | -1.918440 | -3.346590 |
| H  | 2.839568  | -2.930757 | -3.343985 |
| H  | 4.111805  | -3.150139 | -2.101215 |
| H  | 1.669963  | 2.635737  | 0.872578  |
| H  | 3.263958  | -0.132822 | -0.422916 |
| O  | 2.709323  | 0.831977  | 0.818576  |
| C  | 1.803140  | 0.106846  | 1.582648  |
| C  | 2.111814  | -1.244552 | 1.771361  |
| C  | 0.655306  | 0.649741  | 2.165795  |
| C  | 1.245304  | -2.060075 | 2.495922  |
| H  | 3.020887  | -1.646722 | 1.336373  |
| C  | -0.206054 | -0.179943 | 2.884240  |
| H  | 0.389404  | 1.688784  | 2.029901  |
| C  | 0.073581  | -1.536442 | 3.045085  |
| H  | 1.488198  | -3.111131 | 2.625218  |
| H  | -1.116739 | 0.243838  | 3.296167  |

|   |           |           |          |
|---|-----------|-----------|----------|
| H | -0.613182 | -2.176900 | 3.589284 |
|---|-----------|-----------|----------|

**M5**

SCF Done: -1042.094525 .a.u

|   |           |           |           |
|---|-----------|-----------|-----------|
| C | -0.734219 | -2.920223 | -1.559201 |
| H | -0.691313 | -3.687084 | -2.337985 |
| H | -1.061179 | -3.412478 | -0.634574 |
| C | -2.656321 | -1.339254 | -1.078542 |
| C | -1.707921 | -1.835969 | -1.934077 |
| H | -3.428603 | -0.667465 | -1.433386 |
| H | -1.724110 | -1.528323 | -2.978498 |
| N | 0.748255  | -1.099103 | -0.966057 |
| C | 0.697987  | -2.424722 | -1.319709 |
| O | 1.655263  | -3.184211 | -1.406119 |
| C | 1.934109  | -0.434023 | -0.644631 |
| C | 1.792019  | 0.964343  | -0.397350 |
| C | 3.213597  | -0.977799 | -0.540162 |
| C | 2.902003  | 1.789026  | -0.059353 |
| C | 4.312607  | -0.159289 | -0.196912 |
| H | 3.350947  | -2.031722 | -0.727756 |
| C | 0.318206  | 2.791675  | -0.321974 |
| C | 2.646027  | 3.166841  | 0.147742  |
| C | 4.182354  | 1.192439  | 0.041346  |
| H | 5.291713  | -0.623967 | -0.123217 |
| C | 1.368646  | 3.667428  | 0.014398  |
| H | -0.707895 | 3.116982  | -0.451344 |
| H | 3.472884  | 3.822056  | 0.408344  |
| H | 5.039134  | 1.806812  | 0.300379  |
| H | 1.154940  | 4.720046  | 0.163122  |

|    |           |           |           |
|----|-----------|-----------|-----------|
| N  | 0.535548  | 1.499214  | -0.509109 |
| Pd | -0.891147 | 0.094126  | -0.944652 |
| O  | -2.343332 | 1.547237  | -0.941073 |
| O  | -2.977804 | 0.760514  | 1.075629  |
| C  | -3.061801 | 1.573526  | 0.158757  |
| C  | -4.024385 | 2.753611  | 0.210353  |
| H  | -4.767718 | 2.591690  | 0.993133  |
| H  | -4.513693 | 2.902242  | -0.756329 |
| H  | -3.465719 | 3.669128  | 0.439801  |
| H  | -2.763422 | -1.715725 | -0.066165 |

### M6-HN-2A

SCF Done: -1216.145952 .a.u

|   |           |           |           |
|---|-----------|-----------|-----------|
| C | 1.348654  | -3.470222 | -0.049418 |
| H | 1.529612  | -4.342393 | -0.685257 |
| H | 1.396329  | -3.811423 | 0.992741  |
| C | -0.976629 | -2.657367 | 0.616470  |
| C | -0.012328 | -2.890986 | -0.336789 |
| H | -2.003711 | -2.461458 | 0.336977  |
| H | -0.292075 | -2.811986 | -1.386572 |
| N | 2.102549  | -1.189012 | -0.078125 |
| C | 2.509108  | -2.481640 | -0.260472 |
| O | 3.642006  | -2.880640 | -0.514560 |
| C | 2.953898  | -0.096122 | -0.142033 |
| C | 2.322786  | 1.179096  | 0.033080  |
| C | 4.334441  | -0.110699 | -0.351245 |
| C | 3.077377  | 2.389398  | -0.010178 |
| C | 5.072603  | 1.090296  | -0.385120 |
| H | 4.823737  | -1.063582 | -0.488608 |

|    |           |           |           |
|----|-----------|-----------|-----------|
| C  | 0.329793  | 2.366735  | 0.379312  |
| C  | 2.373553  | 3.606618  | 0.154341  |
| C  | 4.475953  | 2.322167  | -0.220954 |
| H  | 6.144977  | 1.030834  | -0.549771 |
| C  | 1.010239  | 3.598557  | 0.344569  |
| H  | -0.740942 | 2.304580  | 0.529809  |
| H  | 2.926211  | 4.542004  | 0.122867  |
| H  | 5.053183  | 3.241256  | -0.254749 |
| H  | 0.448136  | 4.518103  | 0.466506  |
| N  | 0.962132  | 1.209703  | 0.235728  |
| Pd | 0.104011  | -0.692410 | 0.252364  |
| H  | -0.789814 | -2.891604 | 1.661735  |
| C  | -1.775253 | 0.008303  | 0.517466  |
| C  | -2.803424 | 0.071136  | -0.493721 |
| C  | -2.338521 | 0.531625  | 1.656609  |
| C  | -3.960902 | 0.656578  | 0.103718  |
| C  | -2.862369 | -0.311790 | -1.843868 |
| H  | -1.920067 | 0.658606  | 2.646691  |
| N  | -3.657572 | 0.930603  | 1.420729  |
| C  | -5.143286 | 0.869349  | -0.613519 |
| C  | -4.037979 | -0.110596 | -2.558046 |
| H  | -1.989554 | -0.751824 | -2.320416 |
| C  | -4.547991 | 1.556055  | 2.370842  |
| C  | -5.166093 | 0.475718  | -1.948102 |
| H  | -6.014394 | 1.323466  | -0.149468 |
| H  | -4.091286 | -0.403125 | -3.602948 |
| H  | -4.062986 | 1.581876  | 3.349297  |
| H  | -4.793717 | 2.584292  | 2.075207  |

|   |           |          |           |
|---|-----------|----------|-----------|
| H | -5.482592 | 0.989600 | 2.462158  |
| H | -6.070168 | 0.625663 | -2.531611 |

### M6-2A-OH

SCF Done: -1252.042740 .a.u

|   |           |           |           |
|---|-----------|-----------|-----------|
| C | 1.288018  | -3.438209 | -0.080294 |
| H | 1.459490  | -4.304910 | -0.726146 |
| H | 1.325139  | -3.793463 | 0.957609  |
| C | -1.024749 | -2.593527 | 0.586011  |
| C | -0.063028 | -2.836144 | -0.367416 |
| H | -2.048428 | -2.381933 | 0.305717  |
| H | -0.340254 | -2.746526 | -1.416975 |
| N | 2.077085  | -1.167982 | -0.084916 |
| C | 2.464949  | -2.465678 | -0.272409 |
| O | 3.594090  | -2.880440 | -0.517882 |
| C | 2.946553  | -0.088835 | -0.135760 |
| C | 2.334278  | 1.195906  | 0.036150  |
| C | 4.328912  | -0.125088 | -0.330342 |
| C | 3.108583  | 2.394084  | 0.002368  |
| C | 5.086605  | 1.063857  | -0.353552 |
| H | 4.804136  | -1.085363 | -0.465375 |
| C | 0.356941  | 2.415042  | 0.360640  |
| C | 2.422601  | 3.622308  | 0.159932  |
| C | 4.508059  | 2.304863  | -0.193414 |
| H | 6.159580  | 0.987452  | -0.506968 |
| C | 1.057228  | 3.635915  | 0.333976  |
| H | -0.716331 | 2.370591  | 0.498264  |
| H | 2.990516  | 4.548727  | 0.135415  |
| H | 5.100158  | 3.214701  | -0.219625 |

|    |           |           |           |
|----|-----------|-----------|-----------|
| H  | 0.508314  | 4.564235  | 0.449338  |
| N  | 0.972213  | 1.247895  | 0.224874  |
| Pd | 0.084644  | -0.640888 | 0.233778  |
| H  | -0.842538 | -2.836443 | 1.630113  |
| C  | -1.786951 | 0.082974  | 0.492392  |
| C  | -2.821990 | 0.121976  | -0.513131 |
| C  | -2.334614 | 0.646646  | 1.621510  |
| C  | -3.971366 | 0.734513  | 0.070107  |
| C  | -2.878734 | -0.313942 | -1.846957 |
| H  | -1.901199 | 0.798562  | 2.601014  |
| N  | -3.643737 | 1.055128  | 1.374062  |
| C  | -5.151171 | 0.916667  | -0.652443 |
| C  | -4.057273 | -0.138632 | -2.562408 |
| H  | -2.020646 | -0.772748 | -2.328360 |
| C  | -5.183802 | 0.472351  | -1.970972 |
| H  | -6.024626 | 1.386576  | -0.208233 |
| H  | -6.091719 | 0.598778  | -2.557614 |
| H  | -4.266197 | 1.471036  | 2.048018  |
| O  | -4.083006 | -0.580631 | -3.865135 |
| H  | -4.954720 | -0.384656 | -4.240028 |

### M6-N-2A

SCF Done: -1232.188589 .a.u

|   |           |           |           |
|---|-----------|-----------|-----------|
| C | 1.407719  | -3.493798 | 0.058802  |
| H | 1.600962  | -4.383124 | -0.548942 |
| H | 1.464817  | -3.799456 | 1.111410  |
| C | -0.927651 | -2.696015 | 0.706836  |
| C | 0.036684  | -2.946712 | -0.242146 |
| H | -1.959322 | -2.526897 | 0.426721  |

|    |           |           |           |
|----|-----------|-----------|-----------|
| H  | -0.247233 | -2.907129 | -1.293048 |
| N  | 2.122848  | -1.202060 | -0.043744 |
| C  | 2.550040  | -2.492854 | -0.190065 |
| O  | 3.687621  | -2.879961 | -0.440153 |
| C  | 2.955984  | -0.097380 | -0.146231 |
| C  | 2.305367  | 1.171866  | -0.004562 |
| C  | 4.335143  | -0.095999 | -0.363706 |
| C  | 3.040019  | 2.392413  | -0.085545 |
| C  | 5.053609  | 1.115299  | -0.436956 |
| H  | 4.839391  | -1.044349 | -0.476000 |
| C  | 0.296105  | 2.336993  | 0.324939  |
| C  | 2.318015  | 3.602281  | 0.051608  |
| C  | 4.438181  | 2.341545  | -0.303639 |
| H  | 6.125768  | 1.068229  | -0.606635 |
| C  | 0.956415  | 3.577941  | 0.253062  |
| H  | -0.772138 | 2.263602  | 0.486463  |
| H  | 2.855352  | 4.545113  | -0.008524 |
| H  | 5.000359  | 3.268366  | -0.366453 |
| H  | 0.380646  | 4.491230  | 0.356289  |
| N  | 0.945483  | 1.186530  | 0.205199  |
| Pd | 0.118798  | -0.727603 | 0.276986  |
| H  | -0.733509 | -2.891968 | 1.758654  |
| C  | -1.769019 | -0.040380 | 0.515701  |
| C  | -2.760265 | 0.073827  | -0.522776 |
| C  | -2.366869 | 0.455708  | 1.652592  |
| C  | -3.929750 | 0.658644  | 0.058250  |
| C  | -2.831777 | -0.234706 | -1.886219 |
| H  | -1.976097 | 0.543601  | 2.657997  |



|   |           |           |           |
|---|-----------|-----------|-----------|
| N | -3.668679 | 0.888168  | 1.389740  |
| C | -4.019793 | 0.045900  | -2.557515 |
| H | -1.981741 | -0.674469 | -2.402637 |
| C | -4.600571 | 1.470307  | 2.332366  |
| C | -5.097534 | 0.626766  | -1.862946 |
| H | -4.125793 | -0.174473 | -3.615100 |
| H | -4.812600 | 0.776562  | 3.154061  |
| H | -4.206000 | 2.403786  | 2.750503  |
| H | -5.525744 | 1.681911  | 1.793729  |
| H | -6.024260 | 0.848229  | -2.388689 |
| N | -5.074389 | 0.942085  | -0.562953 |

#### **M6-HO-2A**

SCF Done: -1252.042256 .a.u

|   |           |           |           |
|---|-----------|-----------|-----------|
| C | 1.548117  | -3.558593 | 0.526910  |
| H | 1.775803  | -4.508135 | 0.032962  |
| H | 1.672619  | -3.713482 | 1.606381  |
| C | -0.796013 | -2.810312 | 1.189802  |
| C | 0.131372  | -3.142341 | 0.229527  |
| H | -1.847916 | -2.737706 | 0.946205  |
| H | -0.205907 | -3.271396 | -0.798012 |
| N | 2.099557  | -1.261024 | 0.091362  |
| C | 2.605456  | -2.531448 | 0.087183  |
| O | 3.753127  | -2.878522 | -0.176695 |
| C | 2.852105  | -0.133160 | -0.205135 |
| C | 2.127947  | 1.103439  | -0.195996 |
| C | 4.216791  | -0.080738 | -0.495955 |
| C | 2.780140  | 2.343804  | -0.463968 |
| C | 4.852014  | 1.149653  | -0.763145 |

|    |           |           |           |
|----|-----------|-----------|-----------|
| H  | 4.775717  | -1.004533 | -0.510360 |
| C  | 0.070122  | 2.186055  | 0.109268  |
| C  | 1.992307  | 3.519401  | -0.429804 |
| C  | 4.166794  | 2.345494  | -0.750990 |
| H  | 5.915977  | 1.142338  | -0.983504 |
| C  | 0.648232  | 3.444229  | -0.143433 |
| H  | -0.982889 | 2.077219  | 0.331786  |
| H  | 2.466324  | 4.476251  | -0.632513 |
| H  | 4.665499  | 3.287657  | -0.957662 |
| H  | 0.022781  | 4.329578  | -0.111269 |
| N  | 0.780225  | 1.066307  | 0.079015  |
| Pd | 0.079230  | -0.870007 | 0.427988  |
| H  | -0.537054 | -2.828708 | 2.245046  |
| C  | -1.835974 | -0.243444 | 0.614748  |
| C  | -2.644153 | 0.305355  | -0.457982 |
| C  | -2.624024 | -0.171984 | 1.728214  |
| C  | -3.905474 | 0.686428  | 0.085506  |
| C  | -2.410794 | 0.519408  | -1.825040 |
| N  | -3.897768 | 0.337487  | 1.436382  |
| C  | -4.902257 | 1.281137  | -0.683995 |
| C  | -3.404095 | 1.113263  | -2.600221 |
| H  | -1.457993 | 0.233271  | -2.262379 |
| C  | -4.634428 | 1.495180  | -2.036652 |
| H  | -5.855744 | 1.569362  | -0.248742 |
| H  | -3.227082 | 1.286753  | -3.658069 |
| H  | -5.390754 | 1.960241  | -2.662344 |
| H  | -4.446054 | 0.833474  | 2.126699  |
| O  | -2.323898 | -0.529290 | 3.011917  |

|   |           |           |          |
|---|-----------|-----------|----------|
| H | -3.088596 | -0.992234 | 3.392802 |
|---|-----------|-----------|----------|

**M7-HN-2A**

SCF Done: -1216.163030 .a.u

|   |           |           |           |
|---|-----------|-----------|-----------|
| C | 1.003723  | -3.215722 | 0.120944  |
| H | 1.131657  | -4.158525 | -0.426461 |
| H | 1.007547  | -3.468547 | 1.190913  |
| C | -1.603752 | -2.766170 | 0.465215  |
| C | -0.283612 | -2.485261 | -0.239382 |
| H | -2.233302 | -3.523782 | -0.022924 |
| H | -0.426838 | -2.439723 | -1.325518 |
| N | 1.929739  | -0.992418 | -0.046042 |
| C | 2.242634  | -2.333884 | -0.124478 |
| O | 3.361393  | -2.801743 | -0.316047 |
| C | 2.825923  | 0.057848  | -0.053216 |
| C | 2.273561  | 1.358210  | 0.235672  |
| C | 4.197160  | -0.028941 | -0.301586 |
| C | 3.113059  | 2.515308  | 0.245322  |
| C | 5.009700  | 1.121941  | -0.277883 |
| H | 4.618171  | -1.002149 | -0.509176 |
| C | 0.397168  | 2.643734  | 0.750195  |
| C | 2.501914  | 3.763902  | 0.518486  |
| C | 4.497290  | 2.375421  | -0.016536 |
| H | 6.071524  | 1.007349  | -0.479135 |
| C | 1.149828  | 3.835404  | 0.765763  |
| H | -0.670495 | 2.657073  | 0.943624  |
| H | 3.117932  | 4.659553  | 0.526892  |
| H | 5.131743  | 3.256867  | -0.010077 |
| H | 0.659396  | 4.780927  | 0.972883  |

|    |           |           |           |
|----|-----------|-----------|-----------|
| N  | 0.929872  | 1.458598  | 0.501883  |
| Pd | -0.005225 | -0.542013 | 0.270109  |
| H  | -1.434871 | -3.095008 | 1.497494  |
| C  | -2.284462 | -1.406969 | 0.461354  |
| C  | -3.180236 | -0.880284 | -0.543025 |
| C  | -2.159219 | -0.404669 | 1.428974  |
| C  | -3.585842 | 0.411674  | -0.111645 |
| C  | -3.672311 | -1.389628 | -1.752861 |
| H  | -1.734316 | -0.470967 | 2.421692  |
| N  | -2.964196 | 0.678987  | 1.092779  |
| C  | -4.462812 | 1.201239  | -0.862758 |
| C  | -4.548868 | -0.611499 | -2.499250 |
| H  | -3.368040 | -2.372925 | -2.099558 |
| C  | -3.168019 | 1.863756  | 1.897188  |
| C  | -4.936642 | 0.669782  | -2.057979 |
| H  | -4.768278 | 2.187728  | -0.527858 |
| H  | -4.939677 | -0.990685 | -3.438552 |
| H  | -2.444352 | 1.866834  | 2.714806  |
| H  | -3.018726 | 2.768052  | 1.296678  |
| H  | -4.180347 | 1.890098  | 2.318725  |
| H  | -5.622565 | 1.255074  | -2.663360 |

### M7-2A-OH

SCF Done: -1252.059270 .a.u

|   |           |           |           |
|---|-----------|-----------|-----------|
| C | 0.994296  | -3.197491 | 0.176042  |
| H | 1.103406  | -4.159606 | -0.340833 |
| H | 1.003725  | -3.414689 | 1.253769  |
| C | -1.605305 | -2.674522 | 0.531227  |
| C | -0.285215 | -2.459328 | -0.198392 |

|    |           |           |           |
|----|-----------|-----------|-----------|
| H  | -2.267882 | -3.424727 | 0.076695  |
| H  | -0.439058 | -2.450098 | -1.283760 |
| N  | 1.955855  | -0.995076 | -0.070593 |
| C  | 2.246348  | -2.343516 | -0.108044 |
| O  | 3.355989  | -2.834960 | -0.292196 |
| C  | 2.865617  | 0.042093  | -0.112835 |
| C  | 2.332262  | 1.356638  | 0.148431  |
| C  | 4.233345  | -0.067826 | -0.370652 |
| C  | 3.184900  | 2.503486  | 0.121734  |
| C  | 5.059375  | 1.073713  | -0.383973 |
| H  | 4.640912  | -1.051263 | -0.556340 |
| C  | 0.475770  | 2.675452  | 0.654099  |
| C  | 2.590137  | 3.765086  | 0.371386  |
| C  | 4.564667  | 2.339909  | -0.150094 |
| H  | 6.117834  | 0.941384  | -0.591986 |
| C  | 1.241711  | 3.858573  | 0.632638  |
| H  | -0.591110 | 2.703079  | 0.859963  |
| H  | 3.215967  | 4.653734  | 0.351766  |
| H  | 5.210063  | 3.213115  | -0.171988 |
| H  | 0.765182  | 4.814592  | 0.823356  |
| N  | 0.993088  | 1.480175  | 0.426220  |
| Pd | 0.031716  | -0.507984 | 0.247658  |
| H  | -1.435494 | -2.972177 | 1.572617  |
| C  | -2.233720 | -1.288955 | 0.485337  |
| C  | -3.096114 | -0.759827 | -0.551205 |
| C  | -2.093221 | -0.269413 | 1.434550  |
| C  | -3.464665 | 0.555714  | -0.165261 |
| C  | -3.574544 | -1.299924 | -1.750632 |

|   |           |           |           |
|---|-----------|-----------|-----------|
| H | -1.677801 | -0.327031 | 2.431180  |
| N | -2.868557 | 0.817648  | 1.058230  |
| C | -4.285702 | 1.346936  | -0.968653 |
| C | -4.402516 | -0.514725 | -2.546507 |
| H | -3.309036 | -2.300214 | -2.075108 |
| C | -4.750590 | 0.796921  | -2.158918 |
| H | -4.562771 | 2.356964  | -0.681492 |
| H | -5.397622 | 1.387840  | -2.803672 |
| H | -2.901138 | 1.696990  | 1.548400  |
| O | -4.860330 | -1.063738 | -3.715668 |
| H | -5.406513 | -0.410469 | -4.178468 |

#### M7-N-2A

SCF Done: -1232.204543 .a.u

|   |           |           |           |
|---|-----------|-----------|-----------|
| C | 1.024257  | -3.260427 | 0.213287  |
| H | 1.185834  | -4.219324 | -0.295944 |
| H | 0.986409  | -3.476984 | 1.290454  |
| C | -1.605796 | -2.819773 | 0.424557  |
| C | -0.253407 | -2.556361 | -0.225227 |
| H | -2.231302 | -3.555934 | -0.099704 |
| H | -0.343631 | -2.540258 | -1.318035 |
| N | 1.933567  | -1.031450 | -0.003405 |
| C | 2.263861  | -2.371194 | -0.012169 |
| O | 3.394653  | -2.832216 | -0.135512 |
| C | 2.815272  | 0.031919  | -0.016698 |
| C | 2.230963  | 1.335402  | 0.181144  |
| C | 4.197368  | -0.044543 | -0.196451 |
| C | 3.050593  | 2.506118  | 0.162803  |
| C | 4.991167  | 1.119877  | -0.193316 |

|    |           |           |           |
|----|-----------|-----------|-----------|
| H  | 4.641618  | -1.019537 | -0.336673 |
| C  | 0.309130  | 2.615001  | 0.517458  |
| C  | 2.406501  | 3.757424  | 0.327103  |
| C  | 4.447981  | 2.376174  | -0.024346 |
| H  | 6.062976  | 1.013410  | -0.337909 |
| C  | 1.041684  | 3.819180  | 0.494149  |
| H  | -0.768876 | 2.621196  | 0.643125  |
| H  | 3.007251  | 4.663277  | 0.311907  |
| H  | 5.068069  | 3.267694  | -0.037312 |
| H  | 0.525366  | 4.766355  | 0.610159  |
| N  | 0.874805  | 1.426786  | 0.379504  |
| Pd | -0.014716 | -0.598324 | 0.237263  |
| H  | -1.486141 | -3.167204 | 1.457540  |
| C  | -2.259445 | -1.444358 | 0.422253  |
| C  | -3.117710 | -0.862274 | -0.583166 |
| C  | -2.154809 | -0.479147 | 1.432670  |
| C  | -3.512724 | 0.420902  | -0.109814 |
| C  | -3.610706 | -1.258509 | -1.829356 |
| H  | -1.744673 | -0.589357 | 2.427485  |
| N  | -2.927749 | 0.630635  | 1.122380  |
| C  | -4.441453 | -0.367207 | -2.504024 |
| H  | -3.350994 | -2.222052 | -2.258365 |
| C  | -3.144731 | 1.787459  | 1.969185  |
| C  | -4.747358 | 0.879953  | -1.928988 |
| H  | -4.853325 | -0.620612 | -3.475216 |
| H  | -2.190613 | 2.154716  | 2.358315  |
| H  | -3.617646 | 2.560619  | 1.361623  |
| H  | -3.803533 | 1.544017  | 2.810789  |

|   |           |          |           |
|---|-----------|----------|-----------|
| H | -5.391032 | 1.577414 | -2.460334 |
| N | -4.295078 | 1.294296 | -0.739548 |

### M7-HO-2A

SCF Done: -1252.053646 .a.u

|   |           |           |           |
|---|-----------|-----------|-----------|
| C | 1.002767  | -3.270519 | 0.241165  |
| H | 1.144798  | -4.252693 | -0.227664 |
| H | 1.004366  | -3.435059 | 1.328150  |
| C | -1.605248 | -2.762713 | 0.578840  |
| C | -0.291947 | -2.582853 | -0.179268 |
| H | -2.296229 | -3.491506 | 0.130471  |
| H | -0.445089 | -2.649694 | -1.262909 |
| N | 1.916335  | -1.057226 | -0.094946 |
| C | 2.239190  | -2.398455 | -0.064384 |
| O | 3.364113  | -2.868879 | -0.205517 |
| C | 2.795969  | 0.003577  | -0.151239 |
| C | 2.217929  | 1.311341  | 0.046440  |
| C | 4.173122  | -0.075971 | -0.367451 |
| C | 3.039007  | 2.480339  | -0.002303 |
| C | 4.966667  | 1.087673  | -0.401908 |
| H | 4.612655  | -1.053639 | -0.505049 |
| C | 0.312717  | 2.595072  | 0.451829  |
| C | 2.403049  | 3.733161  | 0.182138  |
| C | 4.429854  | 2.346857  | -0.230656 |
| H | 6.033899  | 0.978779  | -0.576155 |
| C | 1.045996  | 3.798034  | 0.403790  |
| H | -0.760186 | 2.601959  | 0.627467  |
| H | 3.004498  | 4.637913  | 0.143721  |
| H | 5.050685  | 3.237163  | -0.268997 |



|    |           |           |           |
|----|-----------|-----------|-----------|
| H  | 0.538015  | 4.746748  | 0.543027  |
| N  | 0.868605  | 1.406840  | 0.285288  |
| Pd | -0.023981 | -0.614857 | 0.168120  |
| H  | -1.421873 | -3.067326 | 1.614714  |
| C  | -2.214144 | -1.364747 | 0.576123  |
| C  | -2.977245 | -0.722786 | -0.490732 |
| C  | -2.277755 | -0.485983 | 1.654010  |
| C  | -3.469000 | 0.508284  | 0.010851  |
| C  | -3.283113 | -1.094014 | -1.804947 |
| N  | -3.067223 | 0.611044  | 1.348794  |
| C  | -4.213548 | 1.388868  | -0.767986 |
| C  | -4.038125 | -0.224416 | -2.588043 |
| H  | -2.921548 | -2.034874 | -2.208358 |
| C  | -4.490592 | 1.005531  | -2.080410 |
| H  | -4.572954 | 2.333540  | -0.369747 |
| H  | -4.276684 | -0.496969 | -3.611698 |
| H  | -5.070262 | 1.667348  | -2.716593 |
| H  | -2.973056 | 1.493880  | 1.832879  |
| O  | -1.789678 | -0.664355 | 2.904771  |
| H  | -2.462916 | -0.395295 | 3.552358  |

#### **M8-HN-2A**

SCF Done: -1445.283479 .a.u

|   |           |          |           |
|---|-----------|----------|-----------|
| C | -0.531731 | 3.133064 | -0.355785 |
| H | -0.620300 | 3.415718 | -1.414041 |
| H | -0.244600 | 4.044574 | 0.185489  |
| C | 1.131735  | 1.987718 | 1.203323  |
| C | 0.496248  | 2.007188 | -0.195686 |
| H | 1.646507  | 2.950495 | 1.366758  |

|   |           |           |           |
|---|-----------|-----------|-----------|
| H | 1.292683  | 2.097390  | -0.942651 |
| N | -2.107739 | 1.361010  | 0.010402  |
| C | -1.935666 | 2.727864  | 0.091082  |
| O | -2.795409 | 3.537186  | 0.426508  |
| C | -3.301044 | 0.683373  | 0.214342  |
| C | -3.262583 | -0.739864 | 0.006789  |
| C | -4.520889 | 1.250188  | 0.588186  |
| C | -4.433047 | -1.539458 | 0.177106  |
| C | -5.668830 | 0.447522  | 0.750901  |
| H | -4.563957 | 2.317440  | 0.748083  |
| C | -1.984225 | -2.612518 | -0.556712 |
| C | -4.305410 | -2.933277 | -0.045538 |
| C | -5.647171 | -0.917620 | 0.555436  |
| H | -6.596549 | 0.932634  | 1.042386  |
| C | -3.091641 | -3.472834 | -0.409596 |
| H | -1.005416 | -2.989462 | -0.839819 |
| H | -5.180510 | -3.566513 | 0.076693  |
| H | -6.538906 | -1.523323 | 0.687071  |
| H | -2.973822 | -4.537259 | -0.583588 |
| N | -2.069750 | -1.307734 | -0.358886 |
| H | 0.343134  | 1.932710  | 1.963616  |
| C | 2.095696  | 0.855375  | 1.391714  |
| C | 3.360334  | 0.680674  | 0.723092  |
| C | 1.908383  | -0.272007 | 2.150321  |
| C | 3.883980  | -0.582153 | 1.133191  |
| C | 4.099950  | 1.456656  | -0.183921 |
| H | 1.074701  | -0.538185 | 2.786201  |
| N | 2.979357  | -1.143739 | 2.009764  |

|    |           |           |           |
|----|-----------|-----------|-----------|
| C  | 5.109857  | -1.067891 | 0.668647  |
| C  | 5.320323  | 0.976467  | -0.650776 |
| H  | 3.725901  | 2.422068  | -0.512808 |
| C  | 3.104526  | -2.448040 | 2.619416  |
| C  | 5.820848  | -0.272456 | -0.227141 |
| H  | 5.497501  | -2.029734 | 0.991710  |
| H  | 5.900853  | 1.572677  | -1.348918 |
| H  | 2.274326  | -2.596782 | 3.312832  |
| H  | 3.075988  | -3.243387 | 1.864059  |
| H  | 4.043934  | -2.529265 | 3.178457  |
| H  | 6.778082  | -0.620175 | -0.605046 |
| Pd | -0.531675 | 0.232688  | -0.433474 |
| O  | 1.149391  | -1.046031 | -0.946192 |
| C  | 1.821611  | -0.780668 | -1.947287 |
| O  | 1.491118  | 0.191083  | -2.788127 |
| H  | 0.676962  | 0.622142  | -2.418129 |
| C  | 3.077286  | -1.508567 | -2.303900 |
| H  | 3.930504  | -0.884111 | -2.015520 |
| H  | 3.128747  | -2.446267 | -1.751230 |
| H  | 3.126134  | -1.684103 | -3.381490 |

### **M8-2A-OH**

SCF Done: -1481.179627 .a.u

|   |           |          |           |
|---|-----------|----------|-----------|
| C | -0.386167 | 2.964688 | -0.629763 |
| H | -0.394286 | 3.114745 | -1.718312 |
| H | -0.059350 | 3.915828 | -0.188495 |
| C | 1.099727  | 1.919738 | 1.160515  |
| C | 0.541990  | 1.799797 | -0.266142 |
| H | 1.668366  | 2.863348 | 1.233039  |

|   |           |           |           |
|---|-----------|-----------|-----------|
| H | 1.380149  | 1.736587  | -0.968623 |
| N | -2.112356 | 1.368903  | -0.148978 |
| C | -1.839770 | 2.719471  | -0.227811 |
| O | -2.651771 | 3.623089  | -0.052225 |
| C | -3.364153 | 0.807773  | 0.057151  |
| C | -3.424266 | -0.629568 | 0.029550  |
| C | -4.555876 | 1.501289  | 0.276201  |
| C | -4.661039 | -1.317323 | 0.218622  |
| C | -5.769981 | 0.807919  | 0.459614  |
| H | -4.525152 | 2.580615  | 0.300152  |
| C | -2.264655 | -2.643241 | -0.212362 |
| C | -4.629232 | -2.733635 | 0.178316  |
| C | -5.843028 | -0.569188 | 0.435665  |
| H | -6.672528 | 1.389727  | 0.626634  |
| C | -3.442027 | -3.398490 | -0.034703 |
| H | -1.303278 | -3.120536 | -0.380430 |
| H | -5.556344 | -3.283561 | 0.318998  |
| H | -6.785105 | -1.089510 | 0.581159  |
| H | -3.397222 | -4.482031 | -0.067889 |
| N | -2.260003 | -1.321128 | -0.182999 |
| H | 0.270372  | 2.010648  | 1.872498  |
| C | 1.977933  | 0.769921  | 1.552569  |
| C | 3.258377  | 0.435247  | 0.981510  |
| C | 1.691254  | -0.218918 | 2.460679  |
| C | 3.695574  | -0.774654 | 1.597395  |
| C | 4.069280  | 1.045541  | 0.011308  |
| H | 0.816889  | -0.337266 | 3.085658  |
| N | 2.713927  | -1.150750 | 2.494932  |

|    |           |           |           |
|----|-----------|-----------|-----------|
| C  | 4.915532  | -1.364882 | 1.270641  |
| C  | 5.287576  | 0.456004  | -0.313033 |
| H  | 3.778148  | 1.968021  | -0.479480 |
| C  | 5.706894  | -0.740717 | 0.308114  |
| H  | 5.248368  | -2.283891 | 1.745052  |
| H  | 6.665032  | -1.177763 | 0.034360  |
| Pd | -0.605225 | 0.086787  | -0.345229 |
| O  | 1.000892  | -1.353764 | -0.579376 |
| C  | 1.743014  | -1.274673 | -1.562745 |
| O  | 1.533321  | -0.408947 | -2.545322 |
| H  | 0.737346  | 0.125564  | -2.288338 |
| C  | 2.957904  | -2.128756 | -1.734448 |
| H  | 3.831387  | -1.548093 | -1.417280 |
| H  | 2.878650  | -3.011121 | -1.099340 |
| H  | 3.089015  | -2.408050 | -2.782450 |
| H  | 2.746388  | -1.958481 | 3.095122  |
| O  | 6.060996  | 1.080519  | -1.262067 |
| H  | 6.895835  | 0.596622  | -1.351333 |

#### M8-N-2A

SCF Done: -1461.325394 .a.u

|   |           |          |           |
|---|-----------|----------|-----------|
| C | -0.535614 | 3.131774 | -0.387462 |
| H | -0.617123 | 3.401796 | -1.449519 |
| H | -0.253121 | 4.049982 | 0.144785  |
| C | 1.131743  | 2.012956 | 1.190048  |
| C | 0.492578  | 2.008982 | -0.208339 |
| H | 1.633983  | 2.983557 | 1.344747  |
| H | 1.288569  | 2.087521 | -0.957709 |
| N | -2.112792 | 1.363320 | -0.008163 |

|   |           |           |           |
|---|-----------|-----------|-----------|
| C | -1.942518 | 2.731270  | 0.053975  |
| O | -2.805581 | 3.544443  | 0.370329  |
| C | -3.307565 | 0.687338  | 0.197017  |
| C | -3.265163 | -0.738918 | 0.015053  |
| C | -4.531150 | 1.258949  | 0.549914  |
| C | -4.435672 | -1.537382 | 0.189227  |
| C | -5.679522 | 0.457462  | 0.716536  |
| H | -4.577245 | 2.328715  | 0.690982  |
| C | -1.978484 | -2.619403 | -0.502382 |
| C | -4.303764 | -2.934757 | -0.006776 |
| C | -5.654058 | -0.910787 | 0.545498  |
| H | -6.610414 | 0.946214  | 0.991186  |
| C | -3.085773 | -3.478750 | -0.349631 |
| H | -0.996516 | -3.000025 | -0.769041 |
| H | -5.178816 | -3.567283 | 0.119127  |
| H | -6.545994 | -1.515498 | 0.680060  |
| H | -2.964442 | -4.545950 | -0.502648 |
| N | -2.068043 | -1.311237 | -0.329495 |
| H | 0.347981  | 1.950897  | 1.954584  |
| C | 2.111428  | 0.893999  | 1.374927  |
| C | 3.370558  | 0.733929  | 0.699050  |
| C | 1.933058  | -0.251418 | 2.112715  |
| C | 3.895725  | -0.540364 | 1.079985  |
| C | 4.142044  | 1.485069  | -0.194446 |
| H | 1.099475  | -0.530499 | 2.743099  |
| N | 3.000848  | -1.121489 | 1.949223  |
| C | 5.349361  | 0.938415  | -0.630208 |
| H | 3.815228  | 2.463067  | -0.536763 |

|    |           |           |           |
|----|-----------|-----------|-----------|
| C  | 3.138944  | -2.441069 | 2.529642  |
| C  | 5.751821  | -0.330810 | -0.173402 |
| H  | 5.987492  | 1.483844  | -1.318274 |
| H  | 3.075680  | -2.392692 | 3.621831  |
| H  | 2.359879  | -3.115527 | 2.155822  |
| H  | 4.117782  | -2.827847 | 2.242005  |
| H  | 6.693505  | -0.756623 | -0.513878 |
| Pd | -0.533523 | 0.228730  | -0.419305 |
| O  | 1.152472  | -1.062915 | -0.884947 |
| C  | 1.832275  | -0.827262 | -1.888067 |
| O  | 1.505888  | 0.117607  | -2.760947 |
| H  | 0.684248  | 0.553737  | -2.414216 |
| C  | 3.088833  | -1.567197 | -2.218436 |
| H  | 3.934063  | -0.875949 | -2.136213 |
| H  | 3.232032  | -2.387482 | -1.516556 |
| H  | 3.050438  | -1.934294 | -3.248261 |
| N  | 5.041214  | -1.085804 | 0.674260  |

### M8-HO-2A

SCF Done: -1481.188340 .a.u

|   |           |          |           |
|---|-----------|----------|-----------|
| C | -0.383889 | 3.068965 | -0.700450 |
| H | -0.480537 | 3.259041 | -1.778255 |
| H | -0.074015 | 4.018619 | -0.244158 |
| C | 1.256758  | 2.024849 | 0.951202  |
| C | 0.623741  | 1.942364 | -0.447976 |
| H | 1.861216  | 2.944885 | 1.012570  |
| H | 1.427565  | 1.957143 | -1.192463 |
| N | -1.983582 | 1.362384 | -0.153212 |
| C | -1.788753 | 2.729554 | -0.203297 |

|   |           |           |           |
|---|-----------|-----------|-----------|
| O | -2.632968 | 3.577945  | 0.064622  |
| C | -3.189865 | 0.725571  | 0.112494  |
| C | -3.179658 | -0.709261 | 0.015655  |
| C | -4.393067 | 1.343858  | 0.454313  |
| C | -4.360675 | -1.470902 | 0.264701  |
| C | -5.553563 | 0.578292  | 0.693340  |
| H | -4.415218 | 2.421023  | 0.529787  |
| C | -1.940908 | -2.644366 | -0.411678 |
| C | -4.259739 | -2.880178 | 0.154215  |
| C | -5.558237 | -0.797929 | 0.607198  |
| H | -6.468270 | 1.102380  | 0.956549  |
| C | -3.060430 | -3.469332 | -0.180066 |
| H | -0.972592 | -3.060302 | -0.674920 |
| H | -5.143242 | -3.485747 | 0.339224  |
| H | -6.458446 | -1.374378 | 0.798365  |
| H | -2.962735 | -4.546268 | -0.266757 |
| N | -2.002214 | -1.326325 | -0.320552 |
| H | 0.462585  | 2.146565  | 1.700308  |
| C | 2.102917  | 0.838715  | 1.299251  |
| C | 3.442109  | 0.543369  | 0.861457  |
| C | 1.686876  | -0.273193 | 1.992929  |
| C | 3.791489  | -0.746794 | 1.367256  |
| C | 4.375817  | 1.228550  | 0.068936  |
| N | 2.695699  | -1.210791 | 2.076151  |
| C | 5.027794  | -1.336754 | 1.117006  |
| C | 5.608606  | 0.634811  | -0.197557 |
| H | 4.137363  | 2.208960  | -0.334450 |
| C | 5.933247  | -0.633114 | 0.320698  |



|    |           |           |           |
|----|-----------|-----------|-----------|
| H  | 5.276331  | -2.316323 | 1.516681  |
| H  | 6.334578  | 1.160254  | -0.811626 |
| H  | 6.902510  | -1.071007 | 0.101110  |
| Pd | -0.441837 | 0.174865  | -0.548121 |
| O  | 1.220383  | -1.166031 | -0.932448 |
| C  | 2.006818  | -0.966984 | -1.862997 |
| O  | 1.785282  | -0.046557 | -2.794228 |
| H  | 0.951761  | 0.421175  | -2.543576 |
| C  | 3.286852  | -1.719670 | -2.029146 |
| H  | 4.109607  | -1.082268 | -1.683943 |
| H  | 3.265915  | -2.620664 | -1.417042 |
| H  | 3.455718  | -1.961609 | -3.081513 |
| H  | 2.572651  | -2.131859 | 2.466093  |
| O  | 0.492889  | -0.584347 | 2.547487  |
| H  | -0.197708 | -0.120858 | 2.036533  |

#### **M9-HN-2A**

SCF Done: -1445.305828 .a.u

|   |           |          |           |
|---|-----------|----------|-----------|
| C | 1.654488  | 2.669143 | -1.142351 |
| H | 2.433142  | 2.090912 | -1.649230 |
| H | 1.679860  | 3.690091 | -1.534258 |
| C | 0.867704  | 3.275478 | 1.268591  |
| C | 1.973976  | 2.693922 | 0.366324  |
| H | 1.315756  | 3.511194 | 2.244545  |
| H | 2.888050  | 3.287738 | 0.491862  |
| N | 0.049716  | 0.791896 | -1.375463 |
| C | 0.278180  | 2.145088 | -1.525365 |
| O | -0.575766 | 2.930326 | -1.943314 |
| C | -1.219929 | 0.241548 | -1.543732 |

|    |           |           |           |
|----|-----------|-----------|-----------|
| C  | -1.373840 | -1.082549 | -1.034900 |
| C  | -2.347811 | 0.820127  | -2.133845 |
| C  | -2.605635 | -1.793062 | -1.083144 |
| C  | -3.564580 | 0.107744  | -2.205098 |
| H  | -2.274268 | 1.820579  | -2.527883 |
| C  | -0.302436 | -2.863923 | 0.059915  |
| C  | -2.626099 | -3.090308 | -0.512686 |
| C  | -3.717959 | -1.165576 | -1.693278 |
| H  | -4.410978 | 0.595411  | -2.681439 |
| C  | -1.490508 | -3.620339 | 0.059987  |
| H  | 0.624828  | -3.228078 | 0.486797  |
| H  | -3.551500 | -3.659740 | -0.533727 |
| H  | -4.665237 | -1.692574 | -1.755033 |
| H  | -1.489614 | -4.607681 | 0.508023  |
| N  | -0.266702 | -1.656002 | -0.479353 |
| Pd | 1.390789  | -0.550741 | -0.632071 |
| O  | 2.921353  | -1.839738 | 0.043937  |
| O  | 3.431362  | 0.138972  | -0.746631 |
| C  | 3.813048  | -0.970059 | -0.249483 |
| C  | 5.270087  | -1.261736 | -0.038365 |
| H  | 5.701095  | -1.627089 | -0.977869 |
| H  | 5.396579  | -2.031399 | 0.726015  |
| H  | 5.798286  | -0.347497 | 0.243257  |
| H  | 0.514053  | 4.226910  | 0.852111  |
| H  | 2.222218  | 1.685434  | 0.704390  |
| C  | -0.278477 | 1.031472  | 2.043577  |
| C  | -1.605155 | 0.513227  | 1.957190  |
| C  | -1.940465 | -0.763765 | 2.416025  |

|   |           |           |          |
|---|-----------|-----------|----------|
| C | -0.923044 | -1.539677 | 2.964420 |
| C | 0.395645  | -1.052475 | 3.057246 |
| C | 0.723480  | 0.221656  | 2.603907 |
| C | -0.301141 | 2.353149  | 1.463105 |
| C | -1.596028 | 2.572505  | 1.067011 |
| H | -2.955462 | -1.142125 | 2.342315 |
| H | -1.151711 | -2.537711 | 3.327664 |
| H | 1.168175  | -1.682513 | 3.488715 |
| H | 1.743216  | 0.585289  | 2.688517 |
| H | -2.013644 | 3.418524  | 0.540265 |
| C | -3.811345 | 1.365829  | 1.109937 |
| H | -4.389497 | 1.455649  | 2.038682 |
| H | -4.112624 | 2.161202  | 0.425601 |
| H | -4.040138 | 0.408086  | 0.635035 |
| N | -2.390932 | 1.474461  | 1.356104 |

### M9-2A-OH

SCF Done: -1481.202916 .a.u

|   |           |          |           |
|---|-----------|----------|-----------|
| C | -0.890401 | 3.076322 | 1.094623  |
| H | -1.472459 | 2.550053 | 1.856857  |
| H | -0.783909 | 4.118969 | 1.406463  |
| C | -0.836771 | 3.221553 | -1.531110 |
| C | -1.667960 | 3.019900 | -0.244693 |
| H | -1.536380 | 3.452477 | -2.347151 |
| H | -2.443576 | 3.794061 | -0.201108 |
| N | 0.730011  | 1.190291 | 1.125407  |
| C | 0.535288  | 2.555559 | 1.034223  |
| O | 1.457179  | 3.362330 | 0.890226  |
| C | 1.984612  | 0.626507 | 0.902843  |

|    |           |           |           |
|----|-----------|-----------|-----------|
| C  | 1.996515  | -0.795694 | 0.772538  |
| C  | 3.218831  | 1.272495  | 0.761110  |
| C  | 3.170994  | -1.538677 | 0.462597  |
| C  | 4.384176  | 0.538461  | 0.453405  |
| H  | 3.260367  | 2.343837  | 0.865189  |
| C  | 0.683381  | -2.746100 | 0.794769  |
| C  | 3.033904  | -2.943697 | 0.335861  |
| C  | 4.385355  | -0.833234 | 0.289122  |
| H  | 5.314810  | 1.088473  | 0.341497  |
| C  | 1.804878  | -3.545431 | 0.502950  |
| H  | -0.314410 | -3.152091 | 0.915351  |
| H  | 3.913280  | -3.538708 | 0.104181  |
| H  | 5.294227  | -1.376929 | 0.050305  |
| H  | 1.682169  | -4.618622 | 0.408297  |
| N  | 0.800852  | -1.433501 | 0.923626  |
| Pd | -0.757265 | -0.216868 | 1.173870  |
| O  | -2.345428 | -1.581340 | 1.184225  |
| O  | -2.779960 | 0.558184  | 1.351388  |
| C  | -3.208024 | -0.631673 | 1.211600  |
| C  | -4.661707 | -0.928401 | 1.008857  |
| H  | -4.948004 | -1.821845 | 1.570695  |
| H  | -4.809479 | -1.134241 | -0.057665 |
| H  | -5.274232 | -0.075384 | 1.306461  |
| H  | -0.183526 | 4.095092  | -1.421543 |
| H  | -2.194567 | 2.067710  | -0.299593 |
| C  | -0.476996 | 0.667467  | -2.067560 |
| C  | 0.667694  | -0.153347 | -2.285139 |
| C  | 0.566430  | -1.538212 | -2.402894 |

|   |           |           |           |
|---|-----------|-----------|-----------|
| C | -0.697760 | -2.114727 | -2.296898 |
| C | -1.840881 | -1.314886 | -2.098081 |
| C | -1.745069 | 0.067678  | -2.000868 |
| C | -0.006340 | 2.022791  | -1.895618 |
| C | 1.358264  | 1.973508  | -2.031154 |
| H | 1.445108  | -2.159779 | -2.548619 |
| H | -0.806598 | -3.194365 | -2.376099 |
| H | -2.647607 | 0.647688  | -1.848081 |
| H | 2.080599  | 2.766574  | -1.907222 |
| N | 1.773540  | 0.680922  | -2.309584 |
| H | 2.725485  | 0.366090  | -2.197257 |
| O | -3.099619 | -1.868086 | -1.993865 |
| H | -3.005794 | -2.824839 | -1.873795 |

#### M9-N-2A

SCF Done: -1461.347924 .a.u

|   |           |           |           |
|---|-----------|-----------|-----------|
| C | 1.701264  | 2.690278  | -1.066184 |
| H | 2.459392  | 2.104506  | -1.594144 |
| H | 1.753276  | 3.721229  | -1.427828 |
| C | 0.917225  | 3.207785  | 1.365459  |
| C | 2.026524  | 2.664269  | 0.442006  |
| H | 1.369202  | 3.441131  | 2.340040  |
| H | 2.937032  | 3.258800  | 0.586761  |
| N | 0.047821  | 0.867199  | -1.373658 |
| C | 0.304803  | 2.220551  | -1.445521 |
| O | -0.542255 | 3.050375  | -1.784897 |
| C | -1.241293 | 0.360649  | -1.548977 |
| C | -1.434304 | -0.969762 | -1.074079 |
| C | -2.349693 | 0.988448  | -2.123405 |

|    |           |           |           |
|----|-----------|-----------|-----------|
| C  | -2.689747 | -1.635716 | -1.125999 |
| C  | -3.590159 | 0.317165  | -2.206123 |
| H  | -2.246193 | 1.994816  | -2.495272 |
| C  | -0.412175 | -2.818073 | -0.043713 |
| C  | -2.750513 | -2.943236 | -0.583859 |
| C  | -3.783309 | -0.958279 | -1.715667 |
| H  | -4.421179 | 0.841152  | -2.670828 |
| C  | -1.626269 | -3.530493 | -0.045643 |
| H  | 0.508125  | -3.227806 | 0.356309  |
| H  | -3.697039 | -3.476448 | -0.601292 |
| H  | -4.749214 | -1.449971 | -1.777201 |
| H  | -1.655769 | -4.528258 | 0.377419  |
| N  | -0.341420 | -1.594362 | -0.544811 |
| Pd | 1.350869  | -0.539584 | -0.686351 |
| O  | 2.848586  | -1.890474 | -0.054861 |
| O  | 3.407833  | 0.097121  | -0.788034 |
| C  | 3.762112  | -1.037431 | -0.328945 |
| C  | 5.212005  | -1.376167 | -0.140611 |
| H  | 5.621829  | -1.732441 | -1.093000 |
| H  | 5.323819  | -2.167142 | 0.604086  |
| H  | 5.770190  | -0.484731 | 0.155754  |
| H  | 0.534089  | 4.154511  | 0.965596  |
| H  | 2.281410  | 1.645242  | 0.742725  |
| C  | -0.160042 | 0.919293  | 2.102219  |
| C  | -1.479648 | 0.373143  | 2.034126  |
| C  | -0.879896 | -1.613619 | 2.899772  |
| C  | 0.458363  | -1.201732 | 3.023624  |
| C  | 0.832287  | 0.080109  | 2.621414  |

|   |           |           |          |
|---|-----------|-----------|----------|
| C | -0.225596 | 2.253091  | 1.560857 |
| C | -1.538334 | 2.451019  | 1.206851 |
| H | -1.170753 | -2.615484 | 3.209653 |
| H | 1.194041  | -1.889046 | 3.429022 |
| H | 1.863045  | 0.410238  | 2.710522 |
| H | -1.985563 | 3.302323  | 0.714220 |
| C | -3.729965 | 1.185258  | 1.280220 |
| H | -4.298528 | 1.780498  | 2.004563 |
| H | -3.992104 | 1.494529  | 0.265787 |
| H | -3.978647 | 0.131201  | 1.408674 |
| N | -2.304234 | 1.330165  | 1.488121 |
| N | -1.861536 | -0.846350 | 2.409779 |

#### **M9-HO-2A**

SCF Done: -1481.217649 .a.u

|   |           |           |           |
|---|-----------|-----------|-----------|
| C | 1.433703  | 2.842029  | -0.748593 |
| H | 2.258167  | 2.386922  | -1.303163 |
| H | 1.399985  | 3.907918  | -0.990583 |
| C | 0.489321  | 2.981998  | 1.675456  |
| C | 1.694046  | 2.667828  | 0.764621  |
| H | 0.869459  | 3.137343  | 2.695139  |
| H | 2.532032  | 3.324848  | 1.028165  |
| N | -0.025892 | 0.936998  | -1.345230 |
| C | 0.099209  | 2.290408  | -1.208578 |
| O | -0.836326 | 3.089095  | -1.419404 |
| C | -1.282649 | 0.339569  | -1.518601 |
| C | -1.358100 | -1.026161 | -1.122593 |
| C | -2.452961 | 0.923517  | -2.002114 |
| C | -2.566207 | -1.773435 | -1.163524 |

|    |           |           |           |
|----|-----------|-----------|-----------|
| C  | -3.657239 | 0.185795  | -2.044854 |
| H  | -2.438090 | 1.952286  | -2.322327 |
| C  | -0.171552 | -2.852876 | -0.243539 |
| C  | -2.510881 | -3.121068 | -0.727056 |
| C  | -3.737197 | -1.127923 | -1.629879 |
| H  | -4.547026 | 0.684191  | -2.418807 |
| C  | -1.328111 | -3.657052 | -0.269097 |
| H  | 0.785323  | -3.215089 | 0.113792  |
| H  | -3.416229 | -3.721362 | -0.754795 |
| H  | -4.672480 | -1.677968 | -1.669623 |
| H  | -1.267316 | -4.681278 | 0.080769  |
| N  | -0.204592 | -1.600229 | -0.667694 |
| Pd | 1.395277  | -0.405933 | -0.755734 |
| O  | 3.002191  | -1.662145 | -0.228673 |
| O  | 3.378898  | 0.414255  | -0.812498 |
| C  | 3.836552  | -0.713217 | -0.432285 |
| C  | 5.309782  | -0.930276 | -0.253806 |
| H  | 5.759024  | -1.152774 | -1.228758 |
| H  | 5.490771  | -1.773688 | 0.415776  |
| H  | 5.777273  | -0.021985 | 0.134404  |
| H  | 0.030322  | 3.930766  | 1.371466  |
| H  | 2.034481  | 1.646645  | 0.956396  |
| C  | -0.410012 | 0.555898  | 2.180337  |
| C  | -1.672873 | -0.096842 | 2.041602  |
| C  | -1.868797 | -1.427449 | 2.400741  |
| C  | -0.773194 | -2.135957 | 2.895913  |
| C  | 0.481276  | -1.518063 | 3.039915  |
| C  | 0.669310  | -0.180998 | 2.693611  |



|   |           |           |           |
|---|-----------|-----------|-----------|
| C | -0.561409 | 1.909041  | 1.701381  |
| C | -1.867056 | 2.012131  | 1.271778  |
| H | -2.839114 | -1.902163 | 2.286153  |
| H | -0.894860 | -3.178598 | 3.175925  |
| H | 1.316992  | -2.091056 | 3.431817  |
| H | 1.642373  | 0.284034  | 2.821247  |
| N | -2.552745 | 0.830055  | 1.511513  |
| H | -3.440542 | 0.625931  | 1.077643  |
| O | -2.528611 | 3.017284  | 0.669962  |
| H | -1.979652 | 3.290920  | -0.107098 |

### M10-HN-2A

SCF Done: -1445.282564 .a.u

|   |           |           |           |
|---|-----------|-----------|-----------|
| C | 0.556877  | -0.327628 | -0.004069 |
| H | 0.432910  | 0.331030  | -0.871928 |
| H | 0.429979  | 0.325860  | 0.867283  |
| C | 1.949965  | -0.952185 | -0.003754 |
| C | 3.052175  | 0.110788  | 0.000876  |
| H | 2.058568  | -1.600142 | -0.880909 |
| H | 2.055992  | -1.605032 | 0.870111  |
| H | 2.923326  | 0.769657  | -0.871461 |
| H | 2.920756  | 0.764718  | 0.876546  |
| N | -1.842085 | -0.877034 | -0.005825 |
| C | -0.549323 | -1.370308 | -0.009155 |
| O | -0.285220 | -2.572074 | -0.015513 |
| C | -2.957721 | -1.715461 | -0.006314 |
| C | -4.215249 | -1.042087 | 0.002355  |
| C | -2.999350 | -3.113117 | -0.013687 |
| C | -5.463654 | -1.728493 | 0.004220  |

|    |           |           |           |
|----|-----------|-----------|-----------|
| C  | -4.235684 | -3.795135 | -0.012143 |
| H  | -2.072393 | -3.663038 | -0.020348 |
| C  | -5.286968 | 1.052810  | 0.018498  |
| C  | -6.637161 | -0.935739 | 0.013816  |
| C  | -5.451396 | -3.142737 | -0.003399 |
| H  | -4.214142 | -4.881411 | -0.018089 |
| C  | -6.554377 | 0.441290  | 0.021044  |
| H  | -5.154243 | 2.129355  | 0.023727  |
| H  | -7.605005 | -1.429737 | 0.015494  |
| H  | -6.389811 | -3.688326 | -0.002231 |
| H  | -7.442992 | 1.062425  | 0.028588  |
| N  | -4.179184 | 0.323373  | 0.009353  |
| O  | -2.691464 | 3.176625  | 0.010833  |
| O  | -0.638094 | 2.419230  | -0.002297 |
| C  | -0.914973 | 4.821280  | -0.041043 |
| C  | -1.432336 | 3.414240  | -0.000174 |
| H  | -0.707337 | 5.095445  | -1.082040 |
| H  | -1.660025 | 5.511834  | 0.359682  |
| H  | 0.019636  | 4.892671  | 0.520496  |
| Pd | -2.337272 | 1.102745  | 0.002933  |
| C  | 4.444249  | -0.450754 | 0.001324  |
| C  | 5.667472  | 0.313569  | 0.004455  |
| C  | 4.820999  | -1.770903 | -0.001024 |
| C  | 6.747104  | -0.614899 | 0.003777  |
| C  | 5.954120  | 1.687362  | 0.007710  |
| H  | 4.211667  | -2.663840 | -0.003693 |
| N  | 6.205681  | -1.884613 | 0.000439  |
| C  | 8.083844  | -0.204438 | 0.006270  |

|   |          |           |           |
|---|----------|-----------|-----------|
| C | 7.281904 | 2.100901  | 0.010188  |
| H | 5.148188 | 2.416567  | 0.008260  |
| C | 6.961809 | -3.115694 | -0.001167 |
| C | 8.335267 | 1.164452  | 0.009483  |
| H | 8.897791 | -0.923782 | 0.005749  |
| H | 7.515108 | 3.162048  | 0.012717  |
| H | 7.599999 | -3.185927 | -0.890652 |
| H | 7.597516 | -3.189808 | 0.889782  |
| H | 6.267953 | -3.958995 | -0.003975 |
| H | 9.362859 | 1.517147  | 0.011490  |

### **M10-2A-OH**

SCF Done: -1481.179687 .a.u

|   |           |           |           |
|---|-----------|-----------|-----------|
| C | 0.486499  | -0.600110 | -0.002497 |
| H | 0.427322  | 0.067366  | -0.870406 |
| H | 0.424879  | 0.062997  | 0.868600  |
| C | 1.812247  | -1.357180 | -0.002714 |
| C | 3.011002  | -0.404576 | 0.000658  |
| H | 1.856954  | -2.012932 | -0.879724 |
| H | 1.855092  | -2.016768 | 0.871528  |
| H | 2.945511  | 0.263453  | -0.871762 |
| H | 2.943761  | 0.259500  | 0.875961  |
| N | -1.954601 | -0.910383 | -0.004226 |
| C | -0.716746 | -1.528885 | -0.006615 |
| O | -0.572341 | -2.750842 | -0.011543 |
| C | -3.147534 | -1.634364 | -0.004854 |
| C | -4.332486 | -0.840033 | 0.001894  |
| C | -3.326953 | -3.021124 | -0.010875 |
| C | -5.642516 | -1.399964 | 0.003080  |

|    |           |           |           |
|----|-----------|-----------|-----------|
| C  | -4.624545 | -3.577760 | -0.009955 |
| H  | -2.458768 | -3.659845 | -0.016039 |
| C  | -5.192324 | 1.350319  | 0.014842  |
| C  | -6.732122 | -0.495315 | 0.010621  |
| C  | -5.769929 | -2.808509 | -0.003147 |
| H  | -4.710354 | -4.660869 | -0.014802 |
| C  | -6.513894 | 0.866812  | 0.016573  |
| H  | -4.954212 | 2.408573  | 0.019177  |
| H  | -7.743975 | -0.891453 | 0.011738  |
| H  | -6.757637 | -3.258769 | -0.002439 |
| H  | -7.336895 | 1.572608  | 0.022522  |
| N  | -4.161843 | 0.515235  | 0.007642  |
| O  | -2.396961 | 3.207757  | 0.009866  |
| O  | -0.430246 | 2.248031  | -0.000161 |
| C  | -0.463431 | 4.665479  | -0.039046 |
| C  | -1.120299 | 3.318023  | 0.000670  |
| H  | -0.211077 | 4.909459  | -1.077645 |
| H  | -1.141352 | 5.430415  | 0.345328  |
| H  | 0.464399  | 4.646167  | 0.537868  |
| Pd | -2.251618 | 1.108783  | 0.003087  |
| C  | 4.343778  | -1.094353 | 0.000403  |
| C  | 5.630066  | -0.441689 | 0.002445  |
| C  | 4.596577  | -2.444887 | -0.001751 |
| C  | 6.624693  | -1.459587 | 0.001415  |
| C  | 6.019745  | 0.906080  | 0.005026  |
| H  | 3.904771  | -3.274885 | -0.003700 |
| N  | 5.962601  | -2.673952 | -0.001150 |
| C  | 7.985688  | -1.154686 | 0.002912  |

|   |          |           |           |
|---|----------|-----------|-----------|
| C | 7.376715 | 1.208223  | 0.006505  |
| H | 5.293071 | 1.711990  | 0.005881  |
| C | 8.351471 | 0.188197  | 0.005460  |
| H | 8.743700 | -1.933139 | 0.002128  |
| H | 9.405931 | 0.457722  | 0.006658  |
| H | 6.400411 | -3.580451 | -0.002445 |
| O | 7.732755 | 2.537761  | 0.008998  |
| H | 8.699924 | 2.596207  | 0.010136  |

### M10-N-2A

SCF Done: -1461.325130 .a.u

|   |           |           |           |
|---|-----------|-----------|-----------|
| C | 0.557896  | -0.310335 | -0.003564 |
| H | 0.430646  | 0.347573  | -0.871484 |
| H | 0.427703  | 0.342285  | 0.867918  |
| C | 1.953708  | -0.928775 | -0.003261 |
| C | 3.050608  | 0.139600  | 0.001320  |
| H | 2.065166  | -1.576194 | -0.880372 |
| H | 2.062637  | -1.581056 | 0.870587  |
| H | 2.919026  | 0.797559  | -0.871198 |
| H | 2.916588  | 0.792590  | 0.877200  |
| N | -1.837443 | -0.874026 | -0.005637 |
| C | -0.542430 | -1.359632 | -0.008744 |
| O | -0.270075 | -2.559584 | -0.014997 |
| C | -2.948364 | -1.719222 | -0.006375 |
| C | -4.209552 | -1.053080 | 0.002054  |
| C | -2.981567 | -3.116938 | -0.013812 |
| C | -5.453910 | -1.746709 | 0.003606  |
| C | -4.213932 | -3.806279 | -0.012586 |
| H | -2.051449 | -3.661525 | -0.020277 |

|    |           |           |           |
|----|-----------|-----------|-----------|
| C  | -5.293471 | 1.035572  | 0.018081  |
| C  | -6.632028 | -0.960850 | 0.012990  |
| C  | -5.433319 | -3.160896 | -0.004088 |
| H  | -4.186044 | -4.892383 | -0.018582 |
| C  | -6.557263 | 0.416655  | 0.020316  |
| H  | -5.167118 | 2.112880  | 0.023400  |
| H  | -7.596976 | -1.460455 | 0.014429  |
| H  | -6.368526 | -3.711946 | -0.003158 |
| H  | -7.449470 | 1.032605  | 0.027706  |
| N  | -4.181427 | 0.312609  | 0.009133  |
| O  | -2.711291 | 3.174070  | 0.011212  |
| O  | -0.652785 | 2.430504  | -0.001563 |
| C  | -0.946715 | 4.830889  | -0.040616 |
| C  | -1.453908 | 3.420119  | 0.000435  |
| H  | -0.753674 | 5.110937  | -1.082869 |
| H  | -1.692200 | 5.514491  | 0.371158  |
| H  | -0.006475 | 4.907020  | 0.510717  |
| Pd | -2.344262 | 1.102738  | 0.003173  |
| C  | 4.445618  | -0.415449 | 0.001648  |
| C  | 5.665981  | 0.347577  | 0.004316  |
| C  | 4.828975  | -1.736443 | -0.000459 |
| C  | 6.747655  | -0.582326 | 0.003658  |
| C  | 6.006841  | 1.704098  | 0.007159  |
| H  | 4.217827  | -2.628075 | -0.002803 |
| N  | 6.212156  | -1.851690 | 0.000737  |
| C  | 7.361313  | 2.031834  | 0.009102  |
| H  | 5.243118  | 2.477490  | 0.007817  |
| C  | 6.980063  | -3.079342 | -0.000821 |

|   |          |           |           |
|---|----------|-----------|-----------|
| C | 8.330650 | 1.012252  | 0.008180  |
| H | 7.680788 | 3.069292  | 0.011337  |
| H | 8.036280 | -2.805452 | 0.000853  |
| H | 6.761509 | -3.679562 | 0.889647  |
| H | 6.763443 | -3.676106 | -0.894081 |
| H | 9.387951 | 1.269974  | 0.009709  |
| N | 8.048343 | -0.295713 | 0.005474  |

### M10-HO-2A

SCF Done: -1481.183098 .a.u

|   |           |           |           |
|---|-----------|-----------|-----------|
| C | 0.638747  | -0.337130 | -0.003243 |
| H | 0.538214  | 0.323442  | -0.871920 |
| H | 0.535582  | 0.318614  | 0.868793  |
| C | 2.008018  | -1.010794 | -0.003213 |
| C | 3.162346  | -0.003884 | 0.001433  |
| H | 2.072257  | -1.654803 | -0.890015 |
| H | 2.069711  | -1.659990 | 0.880011  |
| H | 3.055111  | 0.658987  | -0.870927 |
| H | 3.052858  | 0.653472  | 0.877679  |
| N | -1.770345 | -0.841409 | -0.005135 |
| C | -0.490698 | -1.356903 | -0.007885 |
| O | -0.241778 | -2.563512 | -0.013441 |
| C | -2.902538 | -1.659697 | -0.005536 |
| C | -4.146329 | -0.962204 | 0.002492  |
| C | -2.969001 | -3.055609 | -0.012322 |
| C | -5.406942 | -1.625414 | 0.004311  |
| C | -4.217824 | -3.715220 | -0.010834 |
| H | -2.052434 | -3.622793 | -0.018473 |
| C | -5.179332 | 1.151853  | 0.017399  |

|    |           |           |           |
|----|-----------|-----------|-----------|
| C  | -6.565868 | -0.811523 | 0.013235  |
| C  | -5.420613 | -3.039862 | -0.002699 |
| H  | -4.216479 | -4.801618 | -0.016318 |
| C  | -6.457771 | 0.563747  | 0.019871  |
| H  | -5.027326 | 2.225866  | 0.022178  |
| H  | -7.542565 | -1.287685 | 0.014873  |
| H  | -6.369026 | -3.567830 | -0.001545 |
| H  | -7.334742 | 1.201160  | 0.026902  |
| N  | -4.084909 | 0.402547  | 0.008887  |
| O  | -2.538077 | 3.227216  | 0.009910  |
| O  | -0.503170 | 2.422968  | -0.002137 |
| C  | -0.724006 | 4.831037  | -0.041216 |
| C  | -1.274116 | 3.437040  | -0.000558 |
| H  | -0.493469 | 5.093799  | -1.080340 |
| H  | -1.458729 | 5.540927  | 0.344266  |
| H  | 0.203514  | 4.883923  | 0.534057  |
| Pd | -2.228432 | 1.147761  | 0.002766  |
| C  | 4.538965  | -0.608460 | 0.001273  |
| C  | 5.766414  | 0.154218  | 0.004813  |
| C  | 4.931833  | -1.929996 | -0.002072 |
| C  | 6.857180  | -0.759951 | 0.003421  |
| C  | 6.041359  | 1.529145  | 0.009023  |
| N  | 6.309013  | -2.031536 | -0.000828 |
| C  | 8.185175  | -0.340529 | 0.006104  |
| C  | 7.367731  | 1.955900  | 0.011717  |
| H  | 5.229605  | 2.251781  | 0.010147  |
| C  | 8.428402  | 1.033260  | 0.010290  |
| H  | 9.003057  | -1.056194 | 0.004996  |



|   |          |           |           |
|---|----------|-----------|-----------|
| H | 7.588296 | 3.019877  | 0.014989  |
| H | 9.453401 | 1.392768  | 0.012473  |
| O | 4.268010 | -3.112243 | -0.006189 |
| H | 3.314387 | -2.938249 | -0.006914 |
| H | 6.803667 | -2.909227 | -0.002583 |

### 2a-HN-2A

SCF Done: -1090.614416 .a.u

|   |           |           |           |
|---|-----------|-----------|-----------|
| C | -0.354452 | -2.713264 | -1.179253 |
| H | -0.031212 | -2.243454 | -2.119845 |
| H | 0.122063  | -2.143763 | -0.370867 |
| C | 1.606372  | -4.325755 | -1.348482 |
| H | 1.895633  | -3.851793 | -2.299364 |
| C | -1.872494 | -2.581188 | -1.101928 |
| O | -2.629029 | -3.434230 | -1.549512 |
| C | -3.603507 | -0.956789 | -0.333654 |
| C | -3.714801 | 0.323230  | 0.306006  |
| C | -4.749943 | -1.630377 | -0.719552 |
| C | -5.006191 | 0.884631  | 0.535581  |
| C | -6.019555 | -1.055149 | -0.482909 |
| H | -4.657734 | -2.593810 | -1.199733 |
| C | -2.650667 | 2.128122  | 1.258157  |
| C | -5.049659 | 2.150410  | 1.171009  |
| C | -6.160635 | 0.170001  | 0.128040  |
| H | -6.901270 | -1.606452 | -0.796852 |
| C | -3.878396 | 2.774434  | 1.533281  |
| H | -1.711315 | 2.603314  | 1.535776  |
| H | -6.014206 | 2.613148  | 1.364298  |
| H | -7.142297 | 0.600543  | 0.304500  |

|   |           |           |           |
|---|-----------|-----------|-----------|
| H | -3.881430 | 3.743872  | 2.021191  |
| N | -2.562677 | 0.951175  | 0.669266  |
| C | 2.082218  | -5.749032 | -1.331045 |
| C | 3.455045  | -6.183791 | -1.404758 |
| C | 1.324473  | -6.890898 | -1.249248 |
| C | 3.450026  | -7.606509 | -1.361924 |
| C | 4.683274  | -5.512151 | -1.502010 |
| H | 2.134506  | -3.756445 | -0.568419 |
| H | 0.251955  | -7.006914 | -1.178650 |
| C | 4.627704  | -8.358313 | -1.412328 |
| C | 5.857175  | -6.255050 | -1.552629 |
| H | 4.715349  | -4.426320 | -1.537585 |
| C | 5.829033  | -7.663222 | -1.508282 |
| H | 4.609187  | -9.443794 | -1.378175 |
| H | 6.813583  | -5.745347 | -1.627949 |
| H | 6.762717  | -8.216992 | -1.549750 |
| C | 1.692166  | -9.390697 | -1.193491 |
| H | 2.098587  | -9.889416 | -0.305177 |
| H | 0.601957  | -9.409645 | -1.135165 |
| H | 2.003959  | -9.952678 | -2.082095 |
| N | 2.135533  | -8.017177 | -1.267349 |
| C | 0.096166  | -4.173595 | -1.152784 |
| H | -0.445915 | -4.716061 | -1.933828 |
| H | -0.199405 | -4.627706 | -0.198513 |
| N | -2.298179 | -1.416686 | -0.510477 |
| H | -1.607705 | -0.760915 | -0.156164 |

**2a-2A-OH**

SCF Done: -1126.511991 .a.u

|   |           |           |           |
|---|-----------|-----------|-----------|
| C | -0.773301 | -3.405096 | 0.517333  |
| H | -0.123610 | -2.525792 | 0.613128  |
| H | -0.860920 | -3.843293 | 1.521559  |
| C | 1.203573  | -4.954897 | 0.071745  |
| H | 1.900247  | -4.112883 | 0.180279  |
| C | -2.177258 | -3.007813 | 0.077342  |
| O | -3.000165 | -3.836635 | -0.291124 |
| C | -3.610833 | -0.979854 | -0.154283 |
| C | -3.559063 | 0.442443  | 0.031483  |
| C | -4.781845 | -1.569018 | -0.600399 |
| C | -4.715943 | 1.230306  | -0.245939 |
| C | -5.916251 | -0.769217 | -0.868717 |
| H | -4.811955 | -2.640173 | -0.738434 |
| C | -2.327651 | 2.287356  | 0.645513  |
| C | -4.601837 | 2.628011  | -0.043280 |
| C | -5.899621 | 0.596720  | -0.700777 |
| H | -6.820864 | -1.259255 | -1.217230 |
| C | -3.413514 | 3.160097  | 0.400957  |
| H | -1.377727 | 2.686165  | 0.997642  |
| H | -5.460684 | 3.263897  | -0.243076 |
| H | -6.778407 | 1.199883  | -0.910890 |
| H | -3.297466 | 4.226660  | 0.565003  |
| N | -2.388429 | 0.981402  | 0.470821  |
| C | 1.803686  | -5.990669 | -0.829724 |
| C | 1.328998  | -7.340381 | -1.015908 |
| C | 2.881783  | -5.840375 | -1.666891 |
| C | 2.171873  | -7.954729 | -1.983561 |
| C | 0.279055  | -8.077129 | -0.446949 |

|   |           |            |           |
|---|-----------|------------|-----------|
| H | 1.069601  | -5.373098  | 1.080335  |
| H | 3.514869  | -4.977075  | -1.821255 |
| C | 1.984871  | -9.276617  | -2.386892 |
| C | 0.095065  | -9.394734  | -0.848761 |
| H | -0.389555 | -7.647660  | 0.291748  |
| C | 0.939115  | -9.989657  | -1.810476 |
| H | 2.630102  | -9.743088  | -3.126142 |
| H | 0.767391  | -11.023330 | -2.104121 |
| N | 3.109628  | -7.011699  | -2.366204 |
| C | -0.153535 | -4.435223  | -0.432098 |
| H | -0.022899 | -3.991880  | -1.427218 |
| H | -0.856445 | -5.264690  | -0.553907 |
| N | -2.428866 | -1.658320  | 0.143447  |
| H | -1.693167 | -1.032230  | 0.456525  |
| O | -0.938328 | -10.095187 | -0.272697 |
| H | -0.959670 | -10.984805 | -0.655811 |
| H | 3.854479  | -7.161633  | -3.026930 |

### 2a-N-2A

SCF Done: -1106.657769 .a.u

|   |           |           |           |
|---|-----------|-----------|-----------|
| C | -0.759198 | -3.374959 | 0.599839  |
| H | -0.112178 | -2.491850 | 0.673145  |
| H | -0.826651 | -3.802875 | 1.609909  |
| C | 1.190507  | -4.961648 | 0.155623  |
| H | 1.903072  | -4.134723 | 0.274761  |
| C | -2.174511 | -2.993936 | 0.181336  |
| O | -3.004639 | -3.839381 | -0.130500 |
| C | -3.615141 | -0.978107 | -0.101283 |
| C | -3.558843 | 0.450386  | 0.024260  |

|   |           |            |           |
|---|-----------|------------|-----------|
| C | -4.795693 | -1.584539  | -0.495340 |
| C | -4.721765 | 1.227065   | -0.258653 |
| C | -5.936217 | -0.795584  | -0.770330 |
| H | -4.828921 | -2.660443  | -0.588310 |
| C | -2.313356 | 2.317680   | 0.532606  |
| C | -4.603019 | 2.631875   | -0.116762 |
| C | -5.915570 | 0.576054   | -0.659372 |
| H | -6.848577 | -1.298690  | -1.077461 |
| C | -3.404634 | 3.180579   | 0.277386  |
| H | -1.355512 | 2.729826   | 0.845642  |
| H | -5.466147 | 3.259869   | -0.322808 |
| H | -6.799015 | 1.170733   | -0.873973 |
| H | -3.284680 | 4.252874   | 0.394291  |
| N | -2.378190 | 1.005635   | 0.413649  |
| C | 1.777407  | -5.998752  | -0.753371 |
| C | 1.249541  | -7.311116  | -1.020934 |
| C | 2.908812  | -5.882905  | -1.525452 |
| C | 2.121000  | -7.929760  | -1.964785 |
| C | 0.154578  | -8.069020  | -0.590753 |
| H | 1.042841  | -5.385043  | 1.160308  |
| H | 3.594145  | -5.049874  | -1.611450 |
| C | 0.008715  | -9.350652  | -1.115176 |
| H | -0.560349 | -7.674069  | 0.125891  |
| C | 0.944272  | -9.841093  | -2.044259 |
| H | 0.827316  | -10.842317 | -2.453872 |
| N | 3.129410  | -7.036965  | -2.260160 |
| C | -0.154379 | -4.413733  | -0.350163 |
| H | -0.014283 | -3.971708  | -1.344507 |

|   |           |           |           |
|---|-----------|-----------|-----------|
| H | -0.874229 | -5.228494 | -0.473341 |
| N | -2.425635 | -1.644206 | 0.197078  |
| H | -1.683393 | -1.004974 | 0.465350  |
| C | 4.221152  | -7.289293 | -3.177882 |
| H | 5.186597  | -7.237692 | -2.662199 |
| H | 4.083268  | -8.293119 | -3.582342 |
| H | 4.216286  | -6.565170 | -4.000150 |
| N | 2.004152  | -9.151732 | -2.481029 |
| H | -0.824039 | -9.979220 | -0.816265 |

### 2a-HO-2A

SCF Done: -1126.510367 .a.u

|   |           |           |           |
|---|-----------|-----------|-----------|
| C | -0.788429 | -3.431651 | 0.641364  |
| H | -0.140354 | -2.553018 | 0.749868  |
| H | -0.863249 | -3.897014 | 1.633874  |
| C | 1.175926  | -4.981821 | 0.144670  |
| H | 1.880710  | -4.152062 | 0.278766  |
| C | -2.199937 | -3.035829 | 0.227103  |
| O | -3.045334 | -3.872897 | -0.065454 |
| C | -3.608254 | -1.002786 | -0.094063 |
| C | -3.529871 | 0.427188  | 0.001047  |
| C | -4.798921 | -1.598662 | -0.474265 |
| C | -4.680924 | 1.215780  | -0.297556 |
| C | -5.927183 | -0.797996 | -0.765041 |
| H | -4.848727 | -2.675659 | -0.544290 |
| C | -2.254992 | 2.285431  | 0.468368  |
| C | -4.540127 | 2.621264  | -0.185835 |
| C | -5.885216 | 0.575256  | -0.683387 |
| H | -6.847625 | -1.293270 | -1.060708 |

|   |           |            |           |
|---|-----------|------------|-----------|
| C | -3.332950 | 3.159624   | 0.195527  |
| H | -1.290429 | 2.689104   | 0.771737  |
| H | -5.393665 | 3.258033   | -0.404664 |
| H | -6.759515 | 1.179003   | -0.909915 |
| H | -3.196220 | 4.232215   | 0.289265  |
| N | -2.340474 | 0.972372   | 0.377675  |
| C | 1.771256  | -5.981805  | -0.796034 |
| C | 1.309778  | -7.328815  | -1.052541 |
| C | 2.864935  | -5.804090  | -1.597853 |
| C | 2.184259  | -7.910241  | -2.011052 |
| C | 0.251514  | -8.097723  | -0.548081 |
| H | 1.035991  | -5.439689  | 1.135117  |
| C | 2.013695  | -9.209304  | -2.484925 |
| C | 0.076189  | -9.396102  | -1.017433 |
| H | -0.427027 | -7.682375  | 0.191739  |
| C | 0.943189  | -9.944452  | -1.979187 |
| H | 2.690092  | -9.634954  | -3.221284 |
| H | 0.779426  | -10.958385 | -2.332474 |
| N | 3.163906  | -6.966389  | -2.305642 |
| C | -0.176509 | -4.435244  | -0.342479 |
| H | -0.041283 | -3.959986  | -1.321919 |
| H | -0.886781 | -5.254761  | -0.489215 |
| N | -2.429822 | -1.681368  | 0.217430  |
| H | -1.675903 | -1.049522  | 0.469587  |
| H | 3.695737  | -6.954668  | -3.164126 |
| H | -0.745728 | -9.996562  | -0.638195 |
| O | 3.619031  | -4.681426  | -1.771119 |
| H | 4.543282  | -4.883325  | -1.548052 |

## TS1

SCF Done: -1578.696228 .a.u

|   |           |           |           |
|---|-----------|-----------|-----------|
| C | -1.095899 | -0.857548 | 0.396574  |
| H | -1.232044 | -0.693521 | 1.472763  |
| H | -0.982309 | 0.139674  | -0.049614 |
| C | -2.301036 | -1.579421 | -0.202287 |
| C | -3.555548 | -0.731469 | -0.066472 |
| H | -2.456386 | -2.543496 | 0.293350  |
| H | -2.119938 | -1.794802 | -1.259469 |
| H | -3.751009 | -0.485499 | 0.988512  |
| H | -3.443442 | 0.214626  | -0.615014 |
| N | 1.350731  | -1.037867 | 0.820872  |
| H | 1.093140  | -0.642814 | 2.026861  |
| C | 0.197771  | -1.624773 | 0.193470  |
| O | 0.271284  | -2.655949 | -0.443398 |
| C | 2.574196  | -1.715773 | 0.499100  |
| C | 3.425677  | -1.088746 | -0.445077 |
| C | 2.922790  | -2.953765 | 0.992602  |
| C | 4.609199  | -1.726121 | -0.907228 |
| C | 4.112803  | -3.587442 | 0.560542  |
| H | 2.266053  | -3.449200 | 1.699137  |
| C | 3.827436  | 0.800414  | -1.775339 |
| C | 5.389915  | -1.030816 | -1.865164 |
| C | 4.936650  | -2.999147 | -0.374320 |
| H | 4.366262  | -4.561386 | 0.967261  |
| C | 4.998745  | 0.215955  | -2.301990 |
| H | 3.496556  | 1.799344  | -2.037669 |
| H | 6.298558  | -1.491236 | -2.243037 |



|   |           |           |           |
|---|-----------|-----------|-----------|
| H | 5.841893  | -3.495811 | -0.710458 |
| H | 5.581595  | 0.767085  | -3.031401 |
| C | -5.884928 | -0.920647 | -0.583077 |
| C | -6.170746 | 0.362432  | -0.101731 |
| C | -6.918027 | -1.719065 | -1.095785 |
| C | -7.487111 | 0.832720  | -0.138528 |
| H | -5.386581 | 0.996628  | 0.294009  |
| C | -8.221256 | -1.237099 | -1.125242 |
| H | -6.669647 | -2.709638 | -1.463156 |
| C | -8.516625 | 0.043935  | -0.645872 |
| H | -7.699698 | 1.830629  | 0.235596  |
| H | -9.012785 | -1.865120 | -1.525134 |
| H | -9.535469 | 0.418498  | -0.670217 |
| O | -4.642142 | -1.482175 | -0.596264 |
| N | 3.079193  | 0.165265  | -0.888416 |
| O | 1.893130  | 2.828875  | -0.500717 |
| O | -0.215270 | 2.555180  | -1.248753 |
| O | 0.388847  | 1.719273  | 1.764224  |
| O | 0.718068  | -0.113303 | 3.049671  |
| C | 0.875048  | 4.685373  | -1.562875 |
| C | 0.792620  | 3.241846  | -1.092042 |
| C | 0.308980  | 1.087752  | 2.853663  |
| C | -0.345921 | 1.775792  | 4.026427  |
| H | -0.553221 | 2.820145  | 3.792174  |
| H | 0.305409  | 1.702700  | 4.902344  |
| H | -1.280272 | 1.258404  | 4.269866  |
| H | 0.848251  | 5.350562  | -0.692513 |
| H | 1.818217  | 4.870101  | -2.086108 |

|    |          |          |           |
|----|----------|----------|-----------|
| H  | 0.029986 | 4.911597 | -2.215622 |
| Pd | 1.587123 | 0.963026 | 0.228177  |

## TS2

SCF Done: -1349.563255 .a.u

|   |           |           |           |
|---|-----------|-----------|-----------|
| C | -1.066916 | -3.283793 | -0.619224 |
| H | -0.710422 | -3.885208 | -1.465463 |
| H | -1.759652 | -3.924221 | -0.059184 |
| C | -1.786132 | -2.037091 | -1.155779 |
| C | -2.510254 | -1.253611 | -0.060477 |
| H | -2.558304 | -2.416223 | -1.840772 |
| H | -1.569766 | -1.358357 | -2.386758 |
| H | -3.418498 | -1.783204 | 0.264835  |
| H | -1.860685 | -1.128217 | 0.812453  |
| N | 0.753881  | -1.827405 | -0.012925 |
| C | 0.139448  | -3.020085 | 0.276330  |
| O | 0.514756  | -3.822221 | 1.127160  |
| C | 1.925087  | -1.361563 | 0.573261  |
| C | 2.394398  | -0.113260 | 0.059755  |
| C | 2.673209  | -1.970180 | 1.579633  |
| C | 3.578366  | 0.505599  | 0.550012  |
| C | 3.849942  | -1.354671 | 2.060434  |
| H | 2.336167  | -2.915295 | 1.979268  |
| C | 2.009070  | 1.640337  | -1.452916 |
| C | 3.942745  | 1.748045  | -0.025998 |
| C | 4.308115  | -0.147606 | 1.573139  |
| H | 4.406187  | -1.858909 | 2.845677  |
| C | 3.167305  | 2.313547  | -1.015765 |
| H | 1.356510  | 2.034116  | -2.224253 |

|    |           |           |           |
|----|-----------|-----------|-----------|
| H  | 4.840792  | 2.248444  | 0.326331  |
| H  | 5.213098  | 0.310873  | 1.959752  |
| H  | 3.429735  | 3.265276  | -1.464489 |
| C  | -2.824663 | 1.105019  | 0.258474  |
| C  | -3.124170 | 1.026029  | 1.622545  |
| C  | -2.473668 | 2.333168  | -0.315324 |
| C  | -3.070808 | 2.181678  | 2.405452  |
| H  | -3.407944 | 0.078386  | 2.067786  |
| C  | -2.433275 | 3.477937  | 0.475664  |
| H  | -2.210195 | 2.355572  | -1.367007 |
| C  | -2.729822 | 3.409953  | 1.840434  |
| H  | -3.305143 | 2.115475  | 3.464378  |
| H  | -2.156440 | 4.427724  | 0.025806  |
| H  | -2.692074 | 4.304171  | 2.455263  |
| O  | -2.869843 | 0.028869  | -0.584777 |
| N  | 1.652917  | 0.476610  | -0.931348 |
| O  | -1.975267 | -0.851648 | -3.558390 |
| O  | -0.657821 | 0.787559  | -2.809427 |
| C  | -2.064998 | 1.256802  | -4.680326 |
| C  | -1.523856 | 0.329856  | -3.620644 |
| H  | -1.375397 | 2.082531  | -4.863391 |
| H  | -2.260209 | 0.705082  | -5.602405 |
| H  | -3.017919 | 1.665708  | -4.324222 |
| Pd | -0.024712 | -0.610467 | -1.386207 |

### TS3

SCF Done: -1349.578283 .a.u

|   |           |           |           |
|---|-----------|-----------|-----------|
| C | -0.810530 | -2.706989 | -1.680781 |
| H | -0.849947 | -2.844742 | -2.769104 |

|    |           |           |           |
|----|-----------|-----------|-----------|
| H  | -0.999069 | -3.696300 | -1.246113 |
| C  | -2.711373 | -2.024814 | -0.151494 |
| C  | -1.868401 | -1.681056 | -1.254626 |
| H  | -3.693186 | -1.565041 | -0.091636 |
| H  | -2.468181 | -1.266529 | -2.071761 |
| N  | 0.791366  | -0.996732 | -1.100661 |
| C  | 0.636963  | -2.338658 | -1.347378 |
| O  | 1.536445  | -3.174984 | -1.344528 |
| C  | 1.987452  | -0.375210 | -0.770555 |
| C  | 1.884536  | 1.020850  | -0.463600 |
| C  | 3.249706  | -0.963497 | -0.699250 |
| C  | 3.022640  | 1.783056  | -0.072873 |
| C  | 4.372654  | -0.199599 | -0.317508 |
| H  | 3.344022  | -2.015109 | -0.925284 |
| C  | 0.471705  | 2.874363  | -0.237403 |
| C  | 2.810591  | 3.150134  | 0.237458  |
| C  | 4.282923  | 1.140969  | -0.002008 |
| H  | 5.337751  | -0.696624 | -0.267976 |
| C  | 1.547896  | 3.695934  | 0.156863  |
| H  | -0.544220 | 3.247579  | -0.318534 |
| H  | 3.658850  | 3.758331  | 0.540735  |
| H  | 5.157044  | 1.711379  | 0.297471  |
| H  | 1.366927  | 4.739745  | 0.390140  |
| N  | 0.642711  | 1.596202  | -0.528797 |
| Pd | -0.826959 | 0.136820  | -0.900274 |
| O  | -2.445000 | 1.466324  | -0.770398 |
| O  | -3.350622 | 0.872917  | 1.223251  |
| C  | -3.255601 | 1.606509  | 0.197114  |

|   |           |           |           |
|---|-----------|-----------|-----------|
| C | -4.203249 | 2.790283  | 0.117519  |
| H | -5.232267 | 2.445140  | 0.256494  |
| H | -4.106447 | 3.310972  | -0.836198 |
| H | -3.981947 | 3.480762  | 0.939003  |
| H | -2.667862 | -3.028834 | 0.261641  |
| H | -2.670137 | -0.317848 | 1.401162  |
| O | -2.252882 | -1.306494 | 1.530453  |
| C | -0.917550 | -1.235900 | 1.880966  |
| C | -0.369740 | -0.018785 | 2.295822  |
| C | -0.129147 | -2.384320 | 1.808304  |
| C | 0.983277  | 0.041826  | 2.627991  |
| H | -0.998922 | 0.862525  | 2.345700  |
| C | 1.225300  | -2.304851 | 2.123352  |
| H | -0.564246 | -3.320536 | 1.475998  |
| C | 1.787264  | -1.093759 | 2.532764  |
| H | 1.413071  | 0.991226  | 2.933900  |
| H | 1.846046  | -3.189112 | 2.022141  |
| H | 2.847886  | -1.031642 | 2.753280  |

**TS4'**

SCF Done: -1445.230484 .a.u

|   |           |           |           |
|---|-----------|-----------|-----------|
| C | -1.047867 | -1.131773 | -1.177179 |
| H | -1.036366 | -1.149767 | -2.274777 |
| H | -1.984577 | -1.617970 | -0.877589 |
| C | -0.940365 | 0.311552  | -0.681981 |
| H | -1.248510 | 1.074548  | -1.395340 |
| N | 1.221902  | -1.293686 | -0.386246 |
| C | 0.112808  | -2.029017 | -0.722369 |
| O | 0.029445  | -3.256699 | -0.721017 |

|    |           |           |           |
|----|-----------|-----------|-----------|
| C  | 2.474087  | -1.803922 | -0.078479 |
| C  | 3.499284  | -0.822159 | 0.153228  |
| C  | 2.834396  | -3.149109 | 0.007757  |
| C  | 4.837762  | -1.206101 | 0.456047  |
| C  | 4.162827  | -3.516976 | 0.309516  |
| H  | 2.075284  | -3.898033 | -0.166352 |
| C  | 4.044614  | 1.452299  | 0.266727  |
| C  | 5.777423  | -0.164139 | 0.664172  |
| C  | 5.155407  | -2.584543 | 0.532429  |
| H  | 4.401832  | -4.575774 | 0.366575  |
| C  | 5.390018  | 1.154774  | 0.571173  |
| H  | 3.671865  | 2.468871  | 0.179704  |
| H  | 6.806957  | -0.424693 | 0.896919  |
| H  | 6.172510  | -2.886143 | 0.765292  |
| H  | 6.096722  | 1.963310  | 0.726520  |
| N  | 3.150237  | 0.500007  | 0.070061  |
| Pd | 1.063768  | 0.695812  | -0.323519 |
| O  | 1.109888  | 2.770879  | -0.286106 |
| O  | -1.083511 | 3.324850  | -0.087381 |
| C  | 0.119718  | 3.598683  | -0.216874 |
| C  | 0.562153  | 5.059903  | -0.314076 |
| H  | -0.292775 | 5.727653  | -0.189175 |
| H  | 1.028098  | 5.239919  | -1.289337 |
| H  | 1.317503  | 5.275676  | 0.449251  |
| C  | -1.437913 | 0.556237  | 0.678747  |
| H  | -1.395598 | -0.320873 | 1.327639  |
| H  | -1.081145 | 1.462093  | 1.153954  |
| C  | -3.992602 | 0.206581  | -0.280712 |

|   |           |           |           |
|---|-----------|-----------|-----------|
| C | -3.645772 | 0.746819  | 1.909154  |
| C | -4.719884 | -0.674658 | 0.542175  |
| C | -4.104537 | 0.092346  | -1.666380 |
| H | -3.323575 | 1.167462  | 2.852729  |
| N | -4.471266 | -0.310539 | 1.881058  |
| C | -5.522178 | -1.696872 | 0.042040  |
| C | -4.917315 | -0.914412 | -2.187055 |
| H | -3.560417 | 0.764887  | -2.320532 |
| C | -4.972219 | -1.045893 | 3.030975  |
| C | -5.608027 | -1.802507 | -1.346125 |
| H | -6.059749 | -2.379129 | 0.692459  |
| H | -5.012828 | -1.021166 | -3.263063 |
| H | -4.562763 | -2.061037 | 3.036667  |
| H | -4.672172 | -0.530042 | 3.944101  |
| H | -6.063892 | -1.099381 | 2.989291  |
| H | -6.222744 | -2.583510 | -1.782284 |
| C | -3.191424 | 1.080365  | 0.596848  |
| H | -2.962044 | 2.108157  | 0.322602  |

#### TS4-HN-2A

SCF Done: -1216.198880 .a.u

|   |           |           |           |
|---|-----------|-----------|-----------|
| C | 1.222923  | -3.323339 | 0.384802  |
| H | 1.397565  | -4.343784 | 0.024573  |
| H | 1.147515  | -3.381446 | 1.479414  |
| C | -1.296320 | -2.514091 | 0.503937  |
| C | -0.061210 | -2.741535 | -0.201357 |
| H | -2.220482 | -2.787433 | 0.002860  |
| H | -0.167426 | -2.907787 | -1.275447 |
| N | 2.153506  | -1.152352 | -0.112758 |

|    |           |           |           |
|----|-----------|-----------|-----------|
| C  | 2.483335  | -2.473293 | 0.073110  |
| O  | 3.611511  | -2.955190 | 0.068193  |
| C  | 3.019498  | -0.080958 | -0.171912 |
| C  | 2.394173  | 1.214195  | -0.065363 |
| C  | 4.406998  | -0.128252 | -0.305454 |
| C  | 3.174727  | 2.407277  | -0.124458 |
| C  | 5.164743  | 1.060032  | -0.352850 |
| H  | 4.883959  | -1.096683 | -0.367858 |
| C  | 0.419676  | 2.440223  | 0.197796  |
| C  | 2.484552  | 3.641541  | -0.026974 |
| C  | 4.580134  | 2.307524  | -0.273272 |
| H  | 6.243053  | 0.980523  | -0.462669 |
| C  | 1.116348  | 3.664310  | 0.129058  |
| H  | -0.657737 | 2.404869  | 0.331678  |
| H  | 3.053238  | 4.566693  | -0.077041 |
| H  | 5.175656  | 3.214451  | -0.321675 |
| H  | 0.570210  | 4.598843  | 0.203702  |
| N  | 1.031675  | 1.271441  | 0.106358  |
| Pd | 0.185389  | -0.719775 | 0.060219  |
| H  | -1.307395 | -2.708328 | 1.573841  |
| C  | -1.877606 | -0.597814 | 0.476870  |
| C  | -2.856390 | -0.210292 | -0.521850 |
| C  | -2.364192 | -0.106958 | 1.677885  |
| C  | -3.876511 | 0.526000  | 0.141406  |
| C  | -2.960624 | -0.415903 | -1.904525 |
| H  | -1.953083 | -0.202030 | 2.674275  |
| N  | -3.551719 | 0.571500  | 1.490808  |
| C  | -4.974012 | 1.064559  | -0.535073 |



|   |           |           |           |
|---|-----------|-----------|-----------|
| C | -4.056388 | 0.107099  | -2.584193 |
| H | -2.187115 | -0.966398 | -2.432963 |
| C | -4.335283 | 1.233943  | 2.511613  |
| C | -5.049388 | 0.842248  | -1.907542 |
| H | -5.740180 | 1.633325  | -0.016299 |
| H | -4.147129 | -0.045708 | -3.655649 |
| H | -3.861975 | 1.075504  | 3.482663  |
| H | -4.396616 | 2.312069  | 2.321666  |
| H | -5.352188 | 0.826390  | 2.544899  |
| H | -5.889170 | 1.244890  | -2.466359 |

#### **TS4-2A-OH**

SCF Done: -1252.011764 .a.u

|   |           |           |           |
|---|-----------|-----------|-----------|
| C | -1.144976 | -3.341369 | -0.224148 |
| H | -1.222888 | -4.338104 | 0.225285  |
| H | -1.219117 | -3.476566 | -1.312026 |
| C | 1.294685  | -2.455433 | -0.751722 |
| C | 0.180700  | -2.674664 | 0.134712  |
| H | 2.290072  | -2.659509 | -0.367213 |
| H | 0.442114  | -2.758407 | 1.191662  |
| N | -2.092182 | -1.173043 | 0.252928  |
| C | -2.386313 | -2.514495 | 0.204044  |
| O | -3.480924 | -3.032692 | 0.399628  |
| C | -2.987916 | -0.130556 | 0.362826  |
| C | -2.441247 | 1.174242  | 0.082865  |
| C | -4.339954 | -0.215748 | 0.694535  |
| C | -3.258027 | 2.340901  | 0.172361  |
| C | -5.135476 | 0.946089  | 0.769736  |
| H | -4.760394 | -1.192953 | 0.888254  |

|    |           |           |           |
|----|-----------|-----------|-----------|
| C  | -0.578787 | 2.445273  | -0.538776 |
| C  | -2.643449 | 3.587921  | -0.104028 |
| C  | -4.623302 | 2.203938  | 0.525169  |
| H  | -6.183452 | 0.837667  | 1.036444  |
| C  | -1.312641 | 3.646401  | -0.453773 |
| H  | 0.469836  | 2.437704  | -0.822167 |
| H  | -3.240055 | 4.494127  | -0.035610 |
| H  | -5.245751 | 3.091016  | 0.597017  |
| H  | -0.824115 | 4.591311  | -0.667519 |
| N  | -1.119684 | 1.265719  | -0.283595 |
| Pd | -0.187792 | -0.686781 | -0.223810 |
| H  | 1.166831  | -2.727948 | -1.796735 |
| C  | 1.791002  | -0.527702 | -0.936786 |
| C  | 2.885689  | -0.046077 | -0.114184 |
| C  | 2.074399  | -0.097959 | -2.224400 |
| C  | 3.769656  | 0.682036  | -0.957065 |
| C  | 3.183918  | -0.177245 | 1.247680  |
| H  | 1.524579  | -0.271667 | -3.139323 |
| N  | 3.242037  | 0.631794  | -2.242457 |
| C  | 4.927170  | 1.284673  | -0.467433 |
| C  | 4.345258  | 0.414418  | 1.737190  |
| H  | 2.525527  | -0.712066 | 1.924229  |
| C  | 5.206613  | 1.141598  | 0.888585  |
| H  | 5.596599  | 1.846540  | -1.112741 |
| H  | 6.103296  | 1.597977  | 1.302545  |
| O  | 4.613763  | 0.266216  | 3.074176  |
| H  | 5.436624  | 0.734015  | 3.282195  |
| H  | 3.662771  | 1.041851  | -3.061936 |

**TS4-N-2A**

SCF Done: -1232.161180 .a.u

|   |           |           |           |
|---|-----------|-----------|-----------|
| C | 1.239088  | -3.326096 | 0.378926  |
| H | 1.420434  | -4.345265 | 0.018660  |
| H | 1.161370  | -3.384960 | 1.473275  |
| C | -1.285038 | -2.529689 | 0.492447  |
| C | -0.046736 | -2.751530 | -0.210574 |
| H | -2.206052 | -2.817219 | -0.006841 |
| H | -0.150236 | -2.921045 | -1.284465 |
| N | 2.157417  | -1.148727 | -0.114824 |
| C | 2.494941  | -2.468115 | 0.070288  |
| O | 3.625915  | -2.942523 | 0.066855  |
| C | 3.017053  | -0.071391 | -0.169979 |
| C | 2.383677  | 1.219215  | -0.060036 |
| C | 4.404756  | -0.110231 | -0.301732 |
| C | 3.157258  | 2.417101  | -0.112289 |
| C | 5.155646  | 1.082731  | -0.343489 |
| H | 4.887721  | -1.075514 | -0.366550 |
| C | 0.401992  | 2.432815  | 0.207001  |
| C | 2.460060  | 3.646895  | -0.009261 |
| C | 4.563449  | 2.326232  | -0.259528 |
| H | 6.234525  | 1.009999  | -0.451902 |
| C | 1.091630  | 3.661143  | 0.145963  |
| H | -0.675227 | 2.391802  | 0.340761  |
| H | 3.023478  | 4.575502  | -0.053757 |
| H | 5.153621  | 3.236861  | -0.302861 |
| H | 0.539974  | 4.591920  | 0.225885  |
| N | 1.020325  | 1.267696  | 0.109188  |

|    |           |           |           |
|----|-----------|-----------|-----------|
| Pd | 0.187840  | -0.728629 | 0.052298  |
| H  | -1.295558 | -2.720094 | 1.563120  |
| C  | -1.880332 | -0.623810 | 0.457672  |
| C  | -2.845214 | -0.229152 | -0.546398 |
| C  | -2.378884 | -0.127899 | 1.654857  |
| C  | -3.866661 | 0.514870  | 0.109547  |
| C  | -2.984358 | -0.396712 | -1.927204 |
| H  | -1.974772 | -0.229013 | 2.653531  |
| N  | -3.558068 | 0.560929  | 1.460634  |
| C  | -4.100680 | 0.171549  | -2.538908 |
| H  | -2.241490 | -0.943090 | -2.502033 |
| C  | -4.357356 | 1.231699  | 2.469075  |
| C  | -5.033632 | 0.891244  | -1.770793 |
| H  | -4.256888 | 0.071774  | -3.608187 |
| H  | -4.679127 | 0.525391  | 3.241561  |
| H  | -3.790699 | 2.042804  | 2.939031  |
| H  | -5.234150 | 1.646701  | 1.969957  |
| H  | -5.900981 | 1.339922  | -2.249934 |
| N  | -4.935084 | 1.076596  | -0.448331 |

#### **TS4-HO-2A**

SCF Done: -1252.619627 .a.u

|   |           |           |           |
|---|-----------|-----------|-----------|
| C | 0.950597  | -3.321250 | 0.042473  |
| H | 1.058938  | -4.319109 | -0.398522 |
| H | 0.882136  | -3.458496 | 1.130325  |
| C | -1.517919 | -2.388284 | 0.253496  |
| C | -0.300165 | -2.618065 | -0.478427 |
| H | -2.455543 | -2.551256 | -0.271863 |
| H | -0.418929 | -2.681686 | -1.562011 |

|    |           |           |           |
|----|-----------|-----------|-----------|
| N  | 2.004820  | -1.177144 | -0.293789 |
| C  | 2.256106  | -2.526238 | -0.221530 |
| O  | 3.352936  | -3.072287 | -0.285829 |
| C  | 2.934622  | -0.159339 | -0.274369 |
| C  | 2.392186  | 1.156209  | -0.041506 |
| C  | 4.314739  | -0.278125 | -0.437571 |
| C  | 3.243853  | 2.300714  | -0.009547 |
| C  | 5.143586  | 0.861773  | -0.393860 |
| H  | 4.730114  | -1.264147 | -0.593832 |
| C  | 0.501024  | 2.469918  | 0.367141  |
| C  | 2.632489  | 3.560490  | 0.210123  |
| C  | 4.638243  | 2.130192  | -0.193360 |
| H  | 6.213411  | 0.727561  | -0.530422 |
| C  | 1.270573  | 3.651187  | 0.393644  |
| H  | -0.574540 | 2.487951  | 0.517637  |
| H  | 3.256290  | 4.450573  | 0.231484  |
| H  | 5.287895  | 3.000274  | -0.172466 |
| H  | 0.783921  | 4.606285  | 0.561436  |
| N  | 1.038294  | 1.279316  | 0.161028  |
| Pd | 0.071340  | -0.642914 | -0.038170 |
| H  | -1.535511 | -2.675975 | 1.302467  |
| C  | -1.963646 | -0.449651 | 0.446661  |
| C  | -2.980211 | 0.091472  | -0.445578 |
| C  | -2.418408 | -0.152894 | 1.716972  |
| C  | -3.996183 | 0.690038  | 0.344887  |
| C  | -3.115289 | 0.107351  | -1.838420 |
| N  | -3.645358 | 0.492112  | 1.687325  |
| C  | -5.107494 | 1.318587  | -0.207144 |

|   |           |           |           |
|---|-----------|-----------|-----------|
| C | -4.231278 | 0.723517  | -2.403392 |
| H | -2.347457 | -0.340094 | -2.463288 |
| C | -5.211375 | 1.328672  | -1.599445 |
| H | -5.868363 | 1.780299  | 0.416364  |
| H | -4.342078 | 0.745058  | -3.483641 |
| H | -6.065410 | 1.811191  | -2.065327 |
| O | -1.826241 | -0.470121 | 2.891788  |
| H | -2.503386 | -0.604246 | 3.575529  |
| H | -3.997278 | 1.061484  | 2.444819  |

### TS5-HN-2A

SCF Done: -1216.117071 .a.u

|   |           |           |           |
|---|-----------|-----------|-----------|
| C | -1.164405 | 2.774870  | 1.778550  |
| H | -1.345102 | 3.855978  | 1.767295  |
| H | -1.072058 | 2.479215  | 2.832730  |
| C | 1.356772  | 1.983861  | 1.595153  |
| C | 0.110763  | 2.418802  | 1.018129  |
| H | 2.272920  | 2.408496  | 1.194870  |
| H | 0.200229  | 2.921361  | 0.052717  |
| N | -2.101548 | 0.873166  | 0.624418  |
| C | -2.429089 | 2.062883  | 1.228992  |
| O | -3.557438 | 2.514760  | 1.395324  |
| C | -2.967837 | -0.127331 | 0.237282  |
| C | -2.340313 | -1.384811 | -0.086384 |
| C | -4.357264 | -0.047238 | 0.146152  |
| C | -3.121115 | -2.500119 | -0.513743 |
| C | -5.115081 | -1.161630 | -0.268921 |
| H | -4.835601 | 0.887436  | 0.404656  |
| C | -0.361383 | -2.619727 | -0.259169 |

|    |           |           |           |
|----|-----------|-----------|-----------|
| C  | -2.428918 | -3.696670 | -0.827404 |
| C  | -4.528709 | -2.365539 | -0.602248 |
| H  | -6.195003 | -1.056954 | -0.331744 |
| C  | -1.058448 | -3.760853 | -0.706826 |
| H  | 0.717960  | -2.623334 | -0.136697 |
| H  | -2.997867 | -4.559954 | -1.163341 |
| H  | -5.124473 | -3.212240 | -0.930373 |
| H  | -0.510769 | -4.666971 | -0.943871 |
| N  | -0.975288 | -1.486713 | 0.038074  |
| Pd | -0.130777 | 0.418657  | 0.620858  |
| H  | 1.384345  | 1.824717  | 2.670540  |
| C  | 1.938490  | 0.180703  | 0.946331  |
| C  | 2.901854  | 0.139320  | -0.138035 |
| C  | 2.443879  | -0.666797 | 1.919197  |
| C  | 3.932492  | -0.765259 | 0.239064  |
| C  | 2.984533  | 0.778127  | -1.383033 |
| H  | 2.048226  | -0.898578 | 2.899289  |
| N  | 3.628688  | -1.242943 | 1.507121  |
| C  | 5.019628  | -1.052411 | -0.590306 |
| C  | 4.069876  | 0.506723  | -2.210407 |
| H  | 2.202657  | 1.464824  | -1.695642 |
| C  | 4.428307  | -2.193545 | 2.249960  |
| C  | 5.073604  | -0.401217 | -1.819862 |
| H  | 5.794023  | -1.753354 | -0.292604 |
| H  | 4.143916  | 0.995620  | -3.177413 |
| H  | 3.970040  | -2.357517 | 3.227285  |
| H  | 4.487205  | -3.153430 | 1.723321  |
| H  | 5.445410  | -1.812687 | 2.397446  |

|   |          |           |           |
|---|----------|-----------|-----------|
| H | 5.904812 | -0.598775 | -2.490454 |
|---|----------|-----------|-----------|

**TS5-2A-OH**

SCF Done: -1252.013560 .a.u

|   |           |           |           |
|---|-----------|-----------|-----------|
| C | -1.152385 | 2.774366  | 1.776451  |
| H | -1.333839 | 3.855317  | 1.763746  |
| H | -1.061447 | 2.479721  | 2.831044  |
| C | 1.369004  | 1.983405  | 1.597176  |
| C | 0.123971  | 2.418602  | 1.018136  |
| H | 2.284913  | 2.408748  | 1.196573  |
| H | 0.215082  | 2.920379  | 0.052522  |
| N | -2.085920 | 0.871320  | 0.621736  |
| C | -2.415523 | 2.060905  | 1.225596  |
| O | -3.544632 | 2.511344  | 1.390438  |
| C | -2.950931 | -0.129471 | 0.232675  |
| C | -2.322243 | -1.386672 | -0.089697 |
| C | -4.340208 | -0.049867 | 0.138509  |
| C | -3.101806 | -2.502259 | -0.518624 |
| C | -5.096733 | -1.164475 | -0.278259 |
| H | -4.819457 | 0.884628  | 0.395927  |
| C | -0.342668 | -2.621056 | -0.257894 |
| C | -2.408646 | -3.698647 | -0.830618 |
| C | -4.509233 | -2.368208 | -0.610210 |
| H | -6.176542 | -1.060104 | -0.343537 |
| C | -1.038461 | -3.762446 | -0.706867 |
| H | 0.736321  | -2.624885 | -0.132422 |
| H | -2.976655 | -4.562114 | -1.167691 |
| H | -5.103956 | -3.215143 | -0.939631 |
| H | -0.490012 | -4.668522 | -0.942299 |



|    |           |           |           |
|----|-----------|-----------|-----------|
| N  | -0.957440 | -1.488040 | 0.037682  |
| Pd | -0.114821 | 0.418332  | 0.620769  |
| H  | 1.395469  | 1.826499  | 2.672974  |
| C  | 1.954986  | 0.183935  | 0.952769  |
| C  | 2.924858  | 0.153069  | -0.126755 |
| C  | 2.449622  | -0.673669 | 1.923744  |
| C  | 3.953797  | -0.755391 | 0.244697  |
| C  | 3.003334  | 0.817468  | -1.356891 |
| H  | 2.042751  | -0.911125 | 2.897208  |
| N  | 3.630654  | -1.244898 | 1.505292  |
| C  | 5.041600  | -1.018092 | -0.586220 |
| C  | 4.094550  | 0.565179  | -2.183931 |
| H  | 2.229658  | 1.505687  | -1.680946 |
| C  | 5.102021  | -0.346675 | -1.803961 |
| H  | 5.822268  | -1.718358 | -0.302605 |
| H  | 5.938957  | -0.527411 | -2.475198 |
| O  | 4.146947  | 1.233095  | -3.380898 |
| H  | 4.943363  | 0.956992  | -3.859119 |
| H  | 4.187530  | -1.894299 | 2.039030  |

**TS5-N-2A**

SCF Done: -1232.158821 .a.u

|   |           |          |          |
|---|-----------|----------|----------|
| C | -1.197145 | 2.766566 | 1.810693 |
| H | -1.386384 | 3.846180 | 1.812411 |
| H | -1.102720 | 2.458777 | 2.861148 |
| C | 1.330274  | 1.996204 | 1.618170 |
| C | 0.080780  | 2.430116 | 1.046043 |
| H | 2.242818  | 2.440113 | 1.230312 |
| H | 0.167335  | 2.947806 | 0.088340 |

|    |           |           |           |
|----|-----------|-----------|-----------|
| N  | -2.117908 | 0.870599  | 0.633596  |
| C  | -2.455605 | 2.050864  | 1.251584  |
| O  | -3.587597 | 2.491138  | 1.421673  |
| C  | -2.975786 | -0.133357 | 0.235116  |
| C  | -2.337796 | -1.382420 | -0.099138 |
| C  | -4.365440 | -0.063067 | 0.142875  |
| C  | -3.109305 | -2.500399 | -0.536156 |
| C  | -5.114111 | -1.179726 | -0.282920 |
| H  | -4.851587 | 0.865288  | 0.409419  |
| C  | -0.349421 | -2.601236 | -0.278186 |
| C  | -2.407749 | -3.689346 | -0.857583 |
| C  | -4.517805 | -2.376028 | -0.625442 |
| H  | -6.194698 | -1.082976 | -0.346127 |
| C  | -1.037061 | -3.744389 | -0.734766 |
| H  | 0.729632  | -2.599156 | -0.153226 |
| H  | -2.969626 | -4.554417 | -1.200623 |
| H  | -5.106457 | -3.224727 | -0.961037 |
| H  | -0.482080 | -4.644722 | -0.976537 |
| N  | -0.971891 | -1.474439 | 0.025567  |
| Pd | -0.145021 | 0.433248  | 0.624393  |
| H  | 1.356838  | 1.819849  | 2.690970  |
| C  | 1.929387  | 0.214732  | 0.943353  |
| C  | 2.879605  | 0.183447  | -0.147983 |
| C  | 2.447467  | -0.647366 | 1.900490  |
| C  | 3.912759  | -0.728853 | 0.209073  |
| C  | 2.997079  | 0.801603  | -1.396240 |
| H  | 2.058549  | -0.887021 | 2.881402  |
| N  | 3.625117  | -1.223782 | 1.472043  |

|   |          |           |           |
|---|----------|-----------|-----------|
| C | 4.105166 | 0.477243  | -2.177402 |
| H | 2.244181 | 1.502576  | -1.746367 |
| C | 4.441396 | -2.185830 | 2.188911  |
| C | 5.051505 | -0.450060 | -1.705264 |
| H | 4.244656 | 0.928014  | -3.154674 |
| H | 4.773384 | -1.774226 | 3.147821  |
| H | 3.883928 | -3.111166 | 2.370111  |
| H | 5.311361 | -2.404840 | 1.568179  |
| H | 5.912413 | -0.707540 | -2.318229 |
| N | 4.973766 | -1.065298 | -0.518500 |

### TS5-HO-2A

SCF Done: -1252.013893 .a.u

|   |           |           |           |
|---|-----------|-----------|-----------|
| C | -1.150720 | 2.739644  | 1.810952  |
| H | -1.333657 | 3.820437  | 1.829864  |
| H | -1.032988 | 2.417286  | 2.854585  |
| C | 1.370647  | 1.976053  | 1.549861  |
| C | 0.106151  | 2.404297  | 1.012185  |
| H | 2.269908  | 2.406681  | 1.116748  |
| H | 0.164901  | 2.920019  | 0.051516  |
| N | -2.107968 | 0.861461  | 0.637174  |
| C | -2.425040 | 2.037952  | 1.272591  |
| O | -3.550665 | 2.484300  | 1.470278  |
| C | -2.981256 | -0.134063 | 0.253593  |
| C | -2.359695 | -1.386693 | -0.098131 |
| C | -4.372305 | -0.053798 | 0.190280  |
| C | -3.147811 | -2.496966 | -0.525231 |
| C | -5.137292 | -1.163196 | -0.224806 |
| H | -4.846011 | 0.876871  | 0.470725  |

|    |           |           |           |
|----|-----------|-----------|-----------|
| C  | -0.384014 | -2.617552 | -0.323940 |
| C  | -2.461097 | -3.688769 | -0.867412 |
| C  | -4.556859 | -2.362198 | -0.585295 |
| H  | -6.218307 | -1.058583 | -0.265420 |
| C  | -1.088606 | -3.753244 | -0.773450 |
| H  | 0.697402  | -2.622161 | -0.222303 |
| H  | -3.035762 | -4.548120 | -1.203727 |
| H  | -5.158370 | -3.204995 | -0.913021 |
| H  | -0.544825 | -4.655729 | -1.032331 |
| N  | -0.992528 | -1.489015 | -0.000228 |
| Pd | -0.138623 | 0.404148  | 0.596785  |
| H  | 1.427794  | 1.802801  | 2.622304  |
| C  | 1.926130  | 0.167999  | 0.904367  |
| C  | 2.921682  | 0.117654  | -0.158012 |
| C  | 2.461202  | -0.597147 | 1.922608  |
| C  | 4.007186  | -0.683358 | 0.284003  |
| C  | 2.984750  | 0.690761  | -1.433189 |
| N  | 3.716858  | -1.085286 | 1.594939  |
| C  | 5.119480  | -0.947699 | -0.508305 |
| C  | 4.100391  | 0.443347  | -2.232200 |
| H  | 2.163196  | 1.303065  | -1.794251 |
| C  | 5.151162  | -0.371713 | -1.779773 |
| H  | 5.934761  | -1.572863 | -0.154259 |
| H  | 4.155806  | 0.879881  | -3.225198 |
| H  | 6.003757  | -0.557100 | -2.426270 |
| O  | 1.915255  | -0.837923 | 3.137291  |
| H  | 2.619157  | -0.953355 | 3.796997  |
| H  | 4.136874  | -1.891953 | 2.036191  |

## 2a-HN-2A

SCF Done: -1090.614803 .a.u

|   |           |           |           |
|---|-----------|-----------|-----------|
| C | -0.787878 | -3.418182 | 0.632941  |
| H | -0.142820 | -2.536960 | 0.739926  |
| H | -0.867748 | -3.875984 | 1.628645  |
| C | 1.182974  | -4.969318 | 0.158579  |
| H | 1.883369  | -4.134650 | 0.295828  |
| C | -2.197532 | -3.027114 | 0.207134  |
| O | -3.034280 | -3.866133 | -0.103654 |
| C | -3.616415 | -0.999487 | -0.102691 |
| C | -3.547888 | 0.429687  | 0.010031  |
| C | -4.799995 | -1.598322 | -0.499852 |
| C | -4.701503 | 1.214517  | -0.288524 |
| C | -5.930948 | -0.801344 | -0.790415 |
| H | -4.842522 | -2.674704 | -0.583013 |
| C | -2.288918 | 2.290201  | 0.510368  |
| C | -4.570738 | 2.619401  | -0.158590 |
| C | -5.898436 | 0.571058  | -0.691975 |
| H | -6.845750 | -1.298831 | -1.099520 |
| C | -3.370243 | 3.160753  | 0.239302  |
| H | -1.329567 | 2.696350  | 0.826696  |
| H | -5.426569 | 3.253337  | -0.376646 |
| H | -6.774724 | 1.171932  | -0.918419 |
| H | -3.241276 | 4.232953  | 0.347337  |
| N | -2.365071 | 0.977791  | 0.402938  |
| C | 1.784265  | -5.981916 | -0.768241 |
| C | 1.290926  | -7.313282 | -1.023591 |
| C | 2.886776  | -5.823301 | -1.569495 |

|   |           |            |           |
|---|-----------|------------|-----------|
| C | 2.152044  | -7.901240  | -1.992625 |
| C | 0.215592  | -8.066614  | -0.526540 |
| H | 1.038590  | -5.414220  | 1.154339  |
| H | 3.543662  | -4.969834  | -1.675468 |
| C | 1.964312  | -9.203212  | -2.466636 |
| C | 0.024585  | -9.361038  | -0.994792 |
| H | -0.458690 | -7.643415  | 0.212960  |
| C | 0.889442  | -9.922811  | -1.955220 |
| H | 2.630182  | -9.639040  | -3.205856 |
| H | -0.805543 | -9.951467  | -0.617762 |
| H | 0.713744  | -10.936843 | -2.302990 |
| C | 4.198164  | -7.177335  | -3.254107 |
| H | 3.808314  | -7.402882  | -4.253918 |
| H | 4.799295  | -6.267549  | -3.312594 |
| H | 4.845344  | -8.004385  | -2.937593 |
| N | 3.120749  | -6.970387  | -2.313581 |
| C | -0.167966 | -4.428196  | -0.339045 |
| H | -0.029894 | -3.961518  | -1.322464 |
| H | -0.875412 | -5.250225  | -0.483350 |
| N | -2.436128 | -1.674143  | 0.210715  |
| H | -1.689422 | -1.040321  | 0.478909  |

**2a-2A-OH**

SCF Done: -1126.511991 .a.u

|   |           |           |          |
|---|-----------|-----------|----------|
| C | -0.773301 | -3.405096 | 0.517333 |
| H | -0.123610 | -2.525792 | 0.613128 |
| H | -0.860920 | -3.843293 | 1.521559 |
| C | 1.203573  | -4.954897 | 0.071745 |
| H | 1.900247  | -4.112883 | 0.180279 |

|   |           |           |           |
|---|-----------|-----------|-----------|
| C | -2.177258 | -3.007813 | 0.077342  |
| O | -3.000165 | -3.836635 | -0.291124 |
| C | -3.610833 | -0.979854 | -0.154283 |
| C | -3.559063 | 0.442443  | 0.031483  |
| C | -4.781845 | -1.569018 | -0.600399 |
| C | -4.715943 | 1.230306  | -0.245939 |
| C | -5.916251 | -0.769217 | -0.868717 |
| H | -4.811955 | -2.640173 | -0.738434 |
| C | -2.327651 | 2.287356  | 0.645513  |
| C | -4.601837 | 2.628011  | -0.043280 |
| C | -5.899621 | 0.596720  | -0.700777 |
| H | -6.820864 | -1.259255 | -1.217230 |
| C | -3.413514 | 3.160097  | 0.400957  |
| H | -1.377727 | 2.686165  | 0.997642  |
| H | -5.460684 | 3.263897  | -0.243076 |
| H | -6.778407 | 1.199883  | -0.910890 |
| H | -3.297466 | 4.226660  | 0.565003  |
| N | -2.388429 | 0.981402  | 0.470821  |
| C | 1.803686  | -5.990669 | -0.829724 |
| C | 1.328998  | -7.340381 | -1.015908 |
| C | 2.881783  | -5.840375 | -1.666891 |
| C | 2.171873  | -7.954729 | -1.983561 |
| C | 0.279055  | -8.077129 | -0.446949 |
| H | 1.069601  | -5.373098 | 1.080335  |
| H | 3.514869  | -4.977075 | -1.821255 |
| C | 1.984871  | -9.276617 | -2.386892 |
| C | 0.095065  | -9.394734 | -0.848761 |
| H | -0.389555 | -7.647660 | 0.291748  |

|   |           |            |           |
|---|-----------|------------|-----------|
| C | 0.939115  | -9.989657  | -1.810476 |
| H | 2.630102  | -9.743088  | -3.126142 |
| H | 0.767391  | -11.023330 | -2.104121 |
| N | 3.109628  | -7.011699  | -2.366204 |
| C | -0.153535 | -4.435223  | -0.432098 |
| H | -0.022899 | -3.991880  | -1.427218 |
| H | -0.856445 | -5.264690  | -0.553907 |
| N | -2.428866 | -1.658320  | 0.143447  |
| H | -1.693167 | -1.032230  | 0.456525  |
| O | -0.938328 | -10.095187 | -0.272697 |
| H | -0.959670 | -10.984805 | -0.655811 |
| H | 3.854479  | -7.161633  | -3.026930 |

**2a-N-2A** .a.u

SCF Done: -1106.657769

|   |           |           |           |
|---|-----------|-----------|-----------|
| C | -0.759198 | -3.374959 | 0.599839  |
| H | -0.112178 | -2.491850 | 0.673145  |
| H | -0.826651 | -3.802875 | 1.609909  |
| C | 1.190507  | -4.961648 | 0.155623  |
| H | 1.903072  | -4.134723 | 0.274761  |
| C | -2.174511 | -2.993936 | 0.181336  |
| O | -3.004639 | -3.839381 | -0.130500 |
| C | -3.615141 | -0.978107 | -0.101283 |
| C | -3.558843 | 0.450386  | 0.024260  |
| C | -4.795693 | -1.584539 | -0.495340 |
| C | -4.721765 | 1.227065  | -0.258653 |
| C | -5.936217 | -0.795584 | -0.770330 |
| H | -4.828921 | -2.660443 | -0.588310 |
| C | -2.313356 | 2.317680  | 0.532606  |



|   |           |            |           |
|---|-----------|------------|-----------|
| C | -4.603019 | 2.631875   | -0.116762 |
| C | -5.915570 | 0.576054   | -0.659372 |
| H | -6.848577 | -1.298690  | -1.077461 |
| C | -3.404634 | 3.180579   | 0.277386  |
| H | -1.355512 | 2.729826   | 0.845642  |
| H | -5.466147 | 3.259869   | -0.322808 |
| H | -6.799015 | 1.170733   | -0.873973 |
| H | -3.284680 | 4.252874   | 0.394291  |
| N | -2.378190 | 1.005635   | 0.413649  |
| C | 1.777407  | -5.998752  | -0.753371 |
| C | 1.249541  | -7.311116  | -1.020934 |
| C | 2.908812  | -5.882905  | -1.525452 |
| C | 2.121000  | -7.929760  | -1.964785 |
| C | 0.154578  | -8.069020  | -0.590753 |
| H | 1.042841  | -5.385043  | 1.160308  |
| H | 3.594145  | -5.049874  | -1.611450 |
| C | 0.008715  | -9.350652  | -1.115176 |
| H | -0.560349 | -7.674069  | 0.125891  |
| C | 0.944272  | -9.841093  | -2.044259 |
| H | 0.827316  | -10.842317 | -2.453872 |
| N | 3.129410  | -7.036965  | -2.260160 |
| C | -0.154379 | -4.413733  | -0.350163 |
| H | -0.014283 | -3.971708  | -1.344507 |
| H | -0.874229 | -5.228494  | -0.473341 |
| N | -2.425635 | -1.644206  | 0.197078  |
| H | -1.683393 | -1.004974  | 0.465350  |
| C | 4.221152  | -7.289293  | -3.177882 |
| H | 5.186597  | -7.237692  | -2.662199 |

|   |           |           |           |
|---|-----------|-----------|-----------|
| H | 4.083268  | -8.293119 | -3.582342 |
| H | 4.216286  | -6.565170 | -4.000150 |
| N | 2.004152  | -9.151732 | -2.481029 |
| H | -0.824039 | -9.979220 | -0.816265 |

## 2a-HO-2A

SCF Done: -1126.510367 .a.u

|   |           |           |           |
|---|-----------|-----------|-----------|
| C | -0.788429 | -3.431651 | 0.641364  |
| H | -0.140354 | -2.553018 | 0.749868  |
| H | -0.863249 | -3.897014 | 1.633874  |
| C | 1.175926  | -4.981821 | 0.144670  |
| H | 1.880710  | -4.152062 | 0.278766  |
| C | -2.199937 | -3.035829 | 0.227103  |
| O | -3.045334 | -3.872897 | -0.065454 |
| C | -3.608254 | -1.002786 | -0.094063 |
| C | -3.529871 | 0.427188  | 0.001047  |
| C | -4.798921 | -1.598662 | -0.474265 |
| C | -4.680924 | 1.215780  | -0.297556 |
| C | -5.927183 | -0.797996 | -0.765041 |
| H | -4.848727 | -2.675659 | -0.544290 |
| C | -2.254992 | 2.285431  | 0.468368  |
| C | -4.540127 | 2.621264  | -0.185835 |
| C | -5.885216 | 0.575256  | -0.683387 |
| H | -6.847625 | -1.293270 | -1.060708 |
| C | -3.332950 | 3.159624  | 0.195527  |
| H | -1.290429 | 2.689104  | 0.771737  |
| H | -5.393665 | 3.258033  | -0.404664 |
| H | -6.759515 | 1.179003  | -0.909915 |
| H | -3.196220 | 4.232215  | 0.289265  |

|   |           |            |           |
|---|-----------|------------|-----------|
| N | -2.340474 | 0.972372   | 0.377675  |
| C | 1.771256  | -5.981805  | -0.796034 |
| C | 1.309778  | -7.328815  | -1.052541 |
| C | 2.864935  | -5.804090  | -1.597853 |
| C | 2.184259  | -7.910241  | -2.011052 |
| C | 0.251514  | -8.097723  | -0.548081 |
| H | 1.035991  | -5.439689  | 1.135117  |
| C | 2.013695  | -9.209304  | -2.484925 |
| C | 0.076189  | -9.396102  | -1.017433 |
| H | -0.427027 | -7.682375  | 0.191739  |
| C | 0.943189  | -9.944452  | -1.979187 |
| H | 2.690092  | -9.634954  | -3.221284 |
| H | 0.779426  | -10.958385 | -2.332474 |
| N | 3.163906  | -6.966389  | -2.305642 |
| C | -0.176509 | -4.435244  | -0.342479 |
| H | -0.041283 | -3.959986  | -1.321919 |
| H | -0.886781 | -5.254761  | -0.489215 |
| N | -2.429822 | -1.681368  | 0.217430  |
| H | -1.675903 | -1.049522  | 0.469587  |
| H | 3.695737  | -6.954668  | -3.164126 |
| H | -0.745728 | -9.996562  | -0.638195 |
| O | 3.619031  | -4.681426  | -1.771119 |
| H | 4.543282  | -4.883325  | -1.548052 |
